## **Modelling seeding and neuroanatomic spread of pathology in amyotrophic lateral sclerosis**

Sneha Pandya<sup>1</sup>, Pedro D. Maia<sup>3</sup>, Benjamin Freeze<sup>1#</sup>, Ricarda A L Menke<sup>2</sup>, Kevin Talbot<sup>2</sup>, Martin R Turner<sup>2\*</sup> and Ashish Raj<sup>1,3\*</sup>

<sup>1</sup>Dept. of Radiology, Weill Cornell Medicine, 1300 York Avenue, New York, NY, USA

<sup>2</sup>Wellcome Centre for Integrative Neuroimaging & Nuffield Department of Clinical Neurosciences, University of Oxford, Oxford, UK

<sup>3</sup>Dept. of Radiology and Biomedical Imaging, University of California, San Francisco, USA

### **\* Address correspondence to:**

|                                            |                         |
|--------------------------------------------|-------------------------|
| Ashish Raj                                 | Prof Martin Turner      |
| Professor of Radiology and Bio-Engineering | West Wing Level 6       |
| 185 Berry Street, Suite 370                | John Radcliffe Hospital |
| University of California at San Francisco  | Oxford OX2 7PZ          |
| San Francisco, CA 94121                    | UK                      |

### **# Current address:**

Department of Radiology  
Massachusetts General Hospital  
Harvard Medical School  
Boston, MA

**Word count:** 4912

**Short title (<40 characters):** Seeding and progression in ALS

## Abstract

The neurodegenerative disorder amyotrophic lateral sclerosis (ALS) is characterized by the progressive loss of upper and lower motor neurons, with pathological involvement of cerebral motor and, additionally, extra-motor areas, in a clinicopathological spectrum with frontotemporal dementia (FTD). A key unresolved question is whether the distribution of pathology in ALS is driven by molecular factors such as regional gene expression, by differential network vulnerability, or is a combination of both. A system of histopathological staging of ALS based on the regional burden of TDP-43 pathology observed in *post mortem* brains has been supported to some extent by analysis of distribution of *in vivo* structural MRI changes. In this paper, computational modelling using a Network Diffusion Model (NDM) was used to investigate whether a process of focal pathological 'seeding' followed by structural network-based spread recapitulated *post mortem* histopathological staging and, secondly, whether this had any relationship to the pattern of expression of a panel of genes implicated in ALS across the healthy brain. Regionally parcellated T1-weighted MRI data from ALS patients (baseline n=79) was studied in relation to a healthy control structural connectome and a database of associated regional cerebral gene expression. The NDM provided strong support for a structural network-based basis for regional pathological spread in ALS, but no simple relationship to the spatial distribution of ALS-related genes in the healthy brain. Intriguingly, the critical seed regions for spread within the model were not within the primary motor cortex but basal ganglia, thalamus and insula, where NDM recapitulated aspects of the *post mortem* histopathological staging system. Within the ALS-FTD clinicopathological spectrum, non-primary motor structures may be among the earliest sites of cerebral pathology.

## 1 **Introduction**

2 Amyotrophic lateral sclerosis (ALS), the commonest phenotype of motor neuron disease, is a  
3 progressive and fatal neurodegenerative disorder with complex molecular underpinnings (Talbot *et*  
4 *al.*, 2018). The disease is clinically characterized by the progressive loss of upper motor neurons in  
5 the primary motor cortex and corticospinal tract and lower motor neurons of the spinal cord and  
6 brainstem. However ALS also involves extra-motor cerebral systems, with clear pathological, genetic  
7 and clinical overlap with frontotemporal dementia (FTD) (Es *et al.*, 2017), with the behavioral variant  
8 being most common. Advances in neuroimaging have revealed many aspects of pathogenesis across  
9 the ALS-FTD spectrum (Turner *et al.*, 2013; Chiò *et al.*, 2014), with increasing interest in its potential  
10 to deliver therapeutic outcome measures (Menke *et al.*, 2017).

11 The pattern of clinical symptom spread in ALS (Ravits *et al.*, 2007b; Turner *et al.*, 2010) and the  
12 associated spinal cord pathology (Ravits and La Spada, 2009), is not random but is focal in onset and  
13 spreads contiguously. Nearly all cases of ALS and around 50% of FTD are associated with cytoplasmic  
14 neuronal and glial inclusions of aggregated 43kDa transactive response DNA-binding protein, TDP-  
15 43 (Neumann *et al.*, 2006). *Post mortem* histopathological classification has been interpreted as  
16 evidence of a stereotyped pattern of cerebral pathological involvement in ALS (Brettschneider *et al.*,  
17 2013). Several molecular mechanisms have been proposed to explain the apparent selective  
18 vulnerability of motor neurons. These include cell-autonomous factors, involving oxidative stress,  
19 excitotoxicity, and mitochondrial dysfunction (Turner *et al.*, 2013) and non cell-autonomous factors  
20 involving cell-cell communication (e.g. glia (Philips and Rothstein, 2014)) or trans-neuronal  
21 transmission of aggregate-prone proteins through prion-like templating (Polymenidou and  
22 Cleveland, 2011; Riku, 2020), in which network connectivity might define the canonical pattern of  
23 spread (Seeley *et al.*, 2009).

24 It is not yet clear how molecular vulnerability and network connectivity might combine in mediating  
25 regional patterns of pathology in ALS. Like other neurodegenerative diseases, the spatial topography  
26 of ALS histopathology is not related in a simple way to regional expression of genes implicated in  
27 pathogenesis (Fusco *et al.*, 1999; Jackson, 2014; Subramaniam, 2019). A high level of clinical and  
28 molecular heterogeneity in the ALS-FTD syndrome meanwhile hamper the ability to map its course  
29 in a precise manner to facilitate effective therapeutic trials (Turner and Swash, 2015).

30 In this paper we address these issues using computational modeling, gene expression analysis and  
31 large observational imaging studies in ALS, combined with prior histopathological staging data. We

1 interrogate whether focal seeding followed by structural network-based spread recapitulate  
2 patterns of ALS pathology by employing a Network Diffusion Model (NDM) to map  
3 neurodegenerative topography (Raj *et al.*, 2012). This model was successful in recapitulating spatial  
4 patterns of diverse proteinopathies including Alzheimer's (Raj *et al.*, 2015), frontotemporal dementia  
5 (Raj *et al.*, 2012), Parkinson's disease (Freeze *et al.*, 2018, 2019; Pandya *et al.*, 2019), Huntington's  
6 disease (Poudel *et al.*, 2019) and progressive supranuclear palsy (Pandya *et al.*, 2017).

## 7 **Methods**

### 8 **Participants**

9 Data used in this study were obtained after informed consent from participants in the longitudinal  
10 Oxford Study for Biomarkers in Motor Neuron Disease ('BioMOx') cohort based on referrals to a large  
11 tertiary ALS clinic and clinical assessment involving two experienced neurologists (KT, MRT). For the  
12 purposes of this group-level analysis, a diagnosis of ALS included those within all El Escorial clinical  
13 diagnostic categories at baseline (including those with pure upper or lower motor neuron syndromes  
14 clinically) who also showed clear progression of motor involvement in subsequent follow-up. Data  
15 were available for 79 such ALS participants (mean age at baseline  $61 \pm 11$  years, male:female 2:1,  
16 mean duration from symptom onset  $49 \pm 57$  months). Of these, 48 were also able to undergo repeat  
17 MRI every 6 months to a maximum of 5 visits in total (cohort overlaps with (Menke *et al.*, 2018)).  
18 One baseline participant initially labelled as ALS was removed from the study cohort later due to  
19 failure to progress. All ALS participants were apparently sporadic (i.e. no family history of ALS or  
20 FTD). The study predated routine genetic testing in the clinic, but subsequent experience predicts  
21 this would have identified up to 3 apparently sporadic ALS gene mutation carriers, which is not felt  
22 to be material to the outcome.

### 23 **Image acquisition and regional volumetric analysis**

24 Images were acquired using a 3T Siemens Trio scanner (Siemens AG) with a 12-channel head coil at  
25 the Oxford Centre for Clinical Magnetic Resonance (OCMR). A high resolution 3D MP-RAGE T1-  
26 weighted sequence was obtained for each subject with the following parameters: 192 axial slices;  
27 repetition and echo time (TR/TE)=2040/4.7 ms, flip angle  $8^\circ$ ,  $1 \times 1 \times 1$  mm<sup>3</sup> voxel size, and 6 min  
28 acquisition time.

29 68 cortical and 18 subcortical volumes from these MRI images were extracted using FreeSurfer  
30 software with a cross-sectional pipeline for both the cohorts. Regional volumes were normalized by

1 total intracranial volume generated by FreeSurfer to correct for head size. Image processing steps  
2 were visually inspected for white-gray matter boundary and skull-stripping errors to ensure they  
3 had been carried out correctly. 6 subjects that rated either ‘partial’ or ‘fail’ due to FreeSurfer failure  
4 or insufficient tissue contrast were excluded from analysis. A vector of regional atrophy was created  
5 by using a two tailed  $t$ -test between ALS and normal mean ICV corrected regional volumes such that  
6  $t_{ALS} = \{t_{ALS}(i) | i \in [1, N]\}$  ( $N = 86$ ). The  $t$ -statistic was converted to the natural positive range between  
7 0 and 1 using the logistic transform given by  $\Phi = 1/(1+\exp(-(t_{ALS} - a_0)/\sigma/\text{std}(t_{ALS})))$ , where,  $\sigma = 2$   
8 and  $a_0 = 0.5 * \sigma$  (Raj *et al.*, 2015). This transformation maps  $t$ -values such that they asymptotically  
9 approach 0 as  $t_{ALS}$  approaches  $-\infty$  and 1 as  $t_{ALS}$  approaches  $+\infty$ . The parameter  $\sigma$  controls the  
10 steepness of the logistic function. These atrophy measures were then used to test the propagation  
11 modeling analyses using NDM.

## 12 **A healthy structural connectome**

13 Axial T1-weighted structural MRI scans using fast spoiled gradient-echo sequence (TE = 1.5 ms, TR =  
14 6.3 ms, TI = 400 ms, 15° flip angle, 230 × 230 × 156 isotropic 1 mm voxels) and high angular  
15 resolution diffusion tensor imaging data (DTI) (55 directions, b = 1,000 s/mm<sup>2</sup>, 72 1.8-mm-thick  
16 interleaved slices, 0.8594 mm × 0.8594 mm planar resolution) were acquired on a 3T GE Signa  
17 EXCITE scanner from fully consented 73 young healthy volunteers under a previous study approved  
18 by Weill Cornell’s institutional review board (Kuceyeski *et al.*, 2013). Thus, the cohort used to extract  
19 a healthy structural connectome was different from the 38 age-matched controls described earlier,  
20 that was used for determining regional atrophy. Probabilistic tractography was performed on the  
21 diffusion MRI data after seeding each voxel at the interface of the WM and GM boundary. The  
22 resulting streamlines were binned into subsets corresponding to every pair of GM regions given by  
23 the parcellation scheme described above. The anatomical connection strength (ACS), a measure of  
24 connectivity, was used in this paper (Iturria-Medina *et al.*, 2007). ACS is defined as the weighted sum  
25 of the streamlines found to exist between any pair of gray matter structures, weighted by each  
26 streamline’s probability score. The ACS is further normalized by a scaling factor equaling to the total  
27 sum of all streamlines. We define  $c_{i,j}$  as the resulting connection strength between  $i^{\text{th}}$  and  $j^{\text{th}}$  GM  
28 regions. We refer to the matrix collecting all pair-wise entries as the connectivity matrix  $C = \{c_{i,j}\}$ .  
29 Here the ACS is used as an approximation of the cross-sectional area of all axonal projections  
30 connecting two regions – a plausible choice given our goal of modeling the amount of pathology  
31 transmission conducted through these projections. Connections are assumed to be bidirectional  
32 since directionality is not deducible from DTI tractography data.

## 1 NDM for ALS pathology spread

2 The hypothetical spread of disease-causing proteinopathy into the network represented by the  
3 connectivity matrix  $C$  over time  $t$  can be captured by starting a diffusion process from a "seed" region.  
4 Since we do not know *a priori* which region is the likely seed, we select every brain region as the seed  
5 region, one at a time (Raj *et al.*, 2012). The overall strategy is to simulate a diffusion process on the  
6 connectivity graph for many time points, starting from each seed location, while recording its  
7 correlation with measured regional atrophy maps.

8 We modeled ALS progression as a diffusion process of the pathology load  $x$  on the graph  $C$  over model  
9 time  $t$ . From (Raj *et al.*, 2012) the transmission of pathology from region 1 to region 2 is represented  
10 as  $\frac{dx_1}{dt} = \beta c_{1,2}(x_2 - x_1)$  where  $x_1$  and  $x_2$  denote the extent of disease-causing pathology in each  
11 region, and  $\beta$  is a global diffusivity constant. Denoting pathology from all regions  $i$  into a vector  
12  $\mathbf{x}(t) = \{x_i(t)\}$ , the above equation extends to become:

$$13 \quad \frac{d\mathbf{x}(t)}{dt} = -\beta H\mathbf{x}(t) \quad (1)$$

14 where  $H$  is the well-known graph Laplacian

$$15 \quad H = I - D^{-\frac{1}{2}}CD^{-\frac{1}{2}} \quad (2)$$

16 where  $D$  is a diagonal matrix whose diagonal entries contain the degree of each node, degree being  
17 defined as the sum of weighted connections emanating from the node. Note, in order to accommodate  
18 regions having widely different out-degrees, we used the degree-normalized version of the Laplacian  
19 matrix (Raj *et al.*, 2015). Eq. 1 admits a closed-form solution  $\mathbf{x}(t) = e^{-\beta Ht}\mathbf{x}_0$  where  $\mathbf{x}_0$  is the initial  
20 pattern of the disease process at  $t = 0$ , and we call term  $e^{-\beta Ht}$  the *diffusion kernel* since it acts  
21 essentially as a spatial and temporal blurring operator on  $\mathbf{x}_0$ . The unit of the model's diffusion time  $t$   
22 is arbitrary (au). Global diffusivity  $\beta$  is unknown, hence we chose a value that would roughly span  
23 ALS progression (3-10 years), giving  $\beta = 1$ .

24 The NDM is described by pathology  $\mathbf{x}(t)$  and our hypothesis is that it should correlate with empirical  
25 atrophy  $\Phi$ , Pearson correlation strength (R statistic) and p-values were calculated between the  
26 (static) empirical atrophy measured on the ALS group  $\Phi$  and  $\mathbf{x}(t)$  at all model timepoints  $t$ .

27 **Repeated seeding.** The NDM was run for all 86 seed regions, each time starting from a different ROI,  
28 such that  $\mathbf{x}_0$  is a unit vector with 1 at the index of the seed and zeros at all other regions. We observed  
29 that the atrophy pattern in our group was generally bilateral, hence for repeated seeding

1 experiments, we chose to seed bilaterally, so that two entries in the “unit” vector were assigned 1.  
2 This was repeated for each region in turn, and the NDM-predicted pathology pattern was calculated.  
3 For each predicted pathology vector  $x^i(t)$  seeded at region  $i$ , the Pearson’s correlation coefficient  $R$   
4 occurring over all model timepoints  $t$  was determined, giving  $R^i(t)$ . “R-t curves” were represented  
5 by plotting these  $R^i(t)$  values on common axis.  $R_{max}^i$  was recorded as the maximum value from each  
6  $R^i(t)$ , which reflected the likelihood of  $i$ -th region as the true region of pathology onset.

7 **Histopathological staging.** We tested whether NDM recapitulated the *post mortem*  
8 histopathological staging published in ALS (Brettschneider *et al.*, 2013), assigning each of the 86  
9 regions available in our atlas an ALS stage from 1 to 4. Regions that were not part of this staging  
10 schema were arbitrarily assigned stage 5, a category that denotes the least vulnerable regions X.

11 **Spatiotemporal evolution from most likely seed regions.** The top five regions  $i$  with the highest  
12  $R_{max}^i$  were chosen to qualify as best seeds, along with the precentral gyrus which is considered a key  
13 early site of ALS. We tabulated a similar list of top 5 seed regions that gave the highest  $R_{max}$  (Pearson  
14 correlation) between the NDM and the ALS TDP-43 pathology staging data. An average of these two  
15  $R_{max}$  values was computed to give a representation of  $R$  ( $R_{avg}$ ) from both empirical atrophy and  
16 TDP-43 staging. The regions with the highest  $R_{avg}$  were considered as the best seeds overall and  
17 were used as seeding locations for further analysis (see Results).

18 **Regional gene expression analysis.** Prominent genes linked to familial ALS were ( $n=25$ ) identified  
19 from various studies (Robberecht and Eykens, 2015; Smith *et al.*, 2017; Vajda *et al.*, 2017; Chia *et al.*,  
20 2018; Karch *et al.*, 2018; Nicolas *et al.*, 2018) and mapped to 86 regions in the Desikan-Killiany atlas  
21 as in (Freeze *et al.*, 2018). Additionally, genes in which pathogenic variants have been associated with  
22 TDP-43 pathology ( $n=26$ ) (Scotter *et al.*, 2015) were also mapped to 86 regions as above. A list of all  
23 the genes used in this study can be found in the supplementary data. For each gene, data was obtained  
24 from the publicly available human Allen Brain Atlas (ABA) (Hawrylycz *et al.*, 2012). Briefly, the ABA  
25 includes 926 brain regions, with each region having microarray expression levels from a set of 58,692  
26 probes that correspond to 21,245 distinct genes. Expression data for each of the 926 regions from  
27 ABA were mapped to the 86 regions of the Desikan-Killiany atlas. All samples for all probes within  
28 the same region were averaged and then normalized for each gene to produce a single expression  
29 value quantified as a z-score. White matter tracts were excluded from the analysis. Expression for  
30 each gene was averaged for six subject brains (which comprises data for 6 left hemispheres and 2  
31 right hemispheres; more information can be found at  
32 [help.brain-map.org/download/attachments/2818165/Normalization\\_WhitePaper.pdf](http://help.brain-map.org/download/attachments/2818165/Normalization_WhitePaper.pdf)).

## 1 **Statistical analyses**

2 Throughout this paper the primary test statistic used to evaluate all models was Pearson's  
3 correlation strength  $R$ . In each case the dependent variable was the vector of regional atrophy or ALS  
4 staging, while the dependent variables were the NDM-predicted regional vector, and/or regional  
5 gene expression. As described above,  $R$  was computed at each model time  $t$  and the highest value was  
6 chosen as the model evidence.

7 For the gene results, genes for each category were corrected for multiple comparisons using  
8 Bonferroni method, with thresholded  $p_{\text{corr}} = 0.05/25 = 0.002$  for ALS-related genes and thresholded  
9  $p_{\text{corr}} = 0.05/26 = 0.0019$  for TDP-43 specific genes. Correlation coefficients with p-values less than  
10  $p_{\text{corr}}$  were considered statistically significant. Next,  $L_1$  regularized regression model was created  
11 containing NDM from the seed region at  $t_{\text{max}}$  ( $\mathbf{x}_{t_{\text{max}}}^{\text{seed}}$ ) and regional genetic expression profiles  
12 averaged across all subjects and probes. Ten-fold cross-validation was performed for each model  
13 across a range of values for the tuning parameter lambda ( $\lambda$ ) using the Matlab script 'lasso'. These  
14 mapped genes and  $\mathbf{x}_{t_{\text{max}}}^{\text{seed}}$  were then correlated with the atrophy to achieve significant predictors for  
15 atrophy. Predictors for each lasso were corrected for multiple comparisons using Bonferroni method,  
16 with thresholded  $p_{\text{corr}} = 0.05/(1+25+26) = 9.6 \times 10^{-4}$  for  $\mathbf{x}_{t_{\text{max}}}^{\text{seed}}$ , ALS-related genes, and TDP-43 specific  
17 genes. Correlation coefficients with p-values less than  $p_{\text{corr}}$  were considered statistically significant.

18 **Random scrambling.** In order to build a null distribution for assigning significance to the NDM, we  
19 performed two levels of randomization experiments. 1) We ran the NDM on 2000 randomly  
20 scrambled versions of the connectivity matrix  $C$ .  $C$  was scrambled using a symmetric transformation  
21 of the network's nodes by randomly permuting entire rows and columns, and the NDM was evaluated  
22 for each shuffled network after bilateral Insula seeding. This scrambling procedure maintains the  
23 edge and node statistics of the true connectivity  $C$ . The NDM evaluated on these 2000 randomly  
24 scrambled networks therefore constitute null or reference models which supplied significance values  
25 to results of the true model. 2) We ran the NDM on 2000 randomly scrambled ALS atrophy vector.  
26 Atrophy values in  $t_{\text{norm}}$  vector were randomly assigned amongst the 86 cerebral regions with 2000  
27 different permutations. This scrambling method maintained the true connectivity  $C$  but replaced true  
28 regional atrophy pattern with a random distribution of atrophy.

## 29 **Data availability**

30 All data used in this study will be made available upon reasonable request and relevant code will be  
31 uploaded to <https://github.com/Raj-Lab-UCSF> repository. Oxford's Wellcome Centre for Integrative



1 Neuroimaging has an inherent commitment to data-sharing. To get access to the data and comply  
2 with the research ethics committee approval an application to the corresponding author will be  
3 required so that the precise geographical extent of sharing is known.

## 4 **Results**

### 5 **Spatial distribution of ALS atrophy and repeated seeding of the NDM**

6 Figure 1A shows glass-brain (LoCastro *et al.*, 2014; Marinescu *et al.*, 2019) illustrations of spatial  
7 distribution of ALS atrophy from our cross-sectional cohort which is consistent with progression of  
8 ALS pathology (Kassubek *et al.*, 2005; Grosskreutz *et al.*, 2006; Mezzapesa *et al.*, 2007; Agosta *et al.*,  
9 2010; Westeneng *et al.*, 2015). Pathology in each region is proportional to the t-statistic of ALS  
10 atrophy after logistic transform, where color towards red show increased severity. Table SI-1 shows  
11 empirical atrophy values of top 20 regions averaged across both the hemispheres.

12 Each region was computationally seeded in succession and the NDM evolved over model time  $t$  on  
13 the healthy connectome  $C$ . The spatial distribution of  $R_{max}$ , which is indicative of the likelihood of  
14 each region as a seed is depicted (Figure 1B). Figure 1C shows the distribution of empirical atrophy  
15 and  $R_{max}$  for each of these 86 regions alongside, which indicates that the NDM-derived seeding  
16 propensity value ( $R_{max}$ ) does not simply reproduce the regions displaying the highest atrophy but  
17 instead reflects the consequence of network transmission starting from that region.

18 Figure 1D shows the R-t curve revealing spread of  $R_{max}$  corresponding to the best fit between  
19 empirical data and the NDM seeded at the  $i^{\text{th}}$  region (Eq. 2). For each region, the R-t curve would yield  
20 an intermediate peak in R, resembling the best match between the NDM and empirical data, and then  
21 after diffusing uniformly with decreasing resemblance between the actual data and the NDM. Table  
22 SI-2 shows top 20 regions with maximum Pearson correlation strength for each region seeded in  
23 succession. Basal ganglia structures and the insula were among the top best seed regions for  
24 predicting ALS atrophy (Table SI-2), with the insula serving as the most likely seed region for ALS  
25 with the highest  $R_{avg}$  as seen in Table 1.

26 To test whether the above results on group regional data and generic ALS staging data are also  
27 applicable to individual ALS subjects, we also ran NDM on ALS individuals and calculated maximum  
28 Pearson's R after seeding each of 43 bilateral ROIs for each subject. Peak R is achieved by frontal,  
29 parietal, temporal and subcortical regions, with frontal and subcortical regions achieving  $R_{max} > 0.4$

1 from most subjects (Figure 1E). Thus, there is considerable inter-subject heterogeneity in seeding,  
 2 while at the group level there is a convergence of the likely seeds in frontoinsular and BG regions.

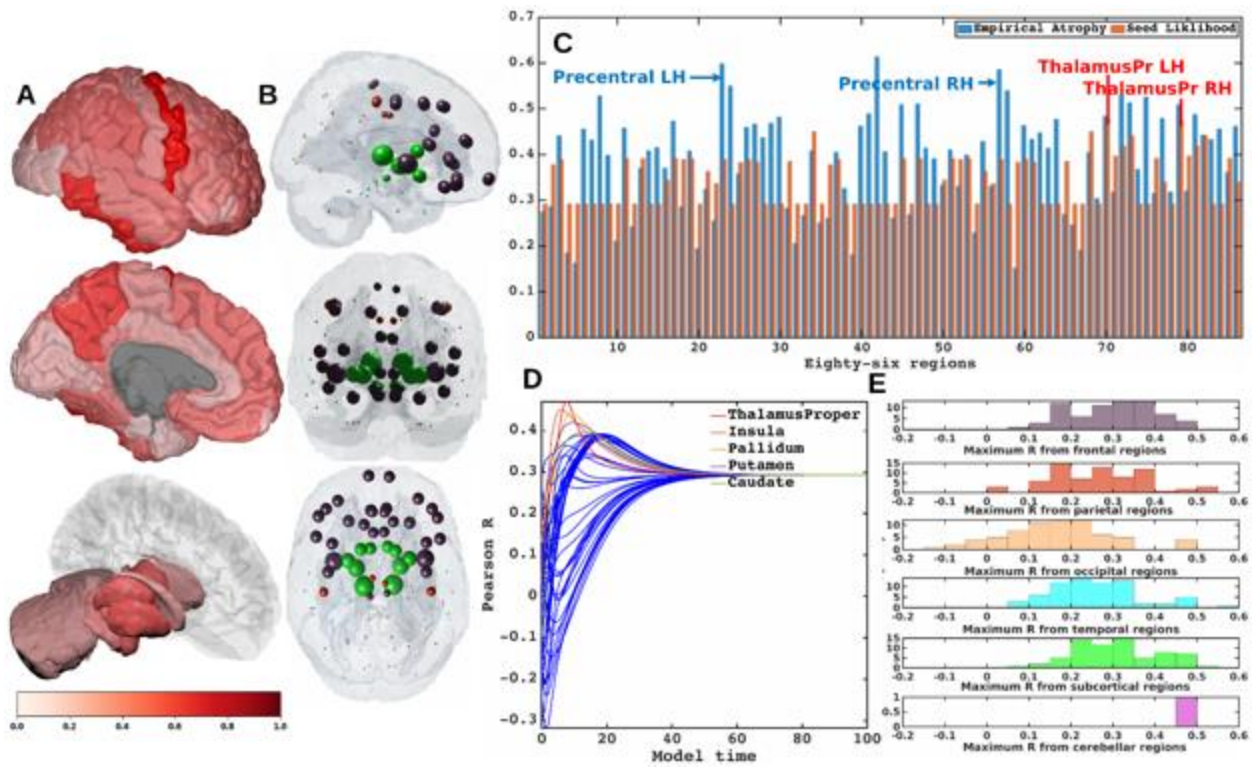

3  
 4 **Figure 1: Spatial distribution of ALS atrophy and repeated seeding.** A] Measured regional ALS  
 5 atrophy are depicted by glass brain visualization. Bilateral volume loss was observed in somatosensory,  
 6 frontotemporal, and subcortical regions, with most atrophy occurring in precentral gyrus, inferior  
 7 temporal gyrus, precuneus, putamen, and thalamus regions. Severity of disease in each region is  
 8 depicted in a color bar, where color towards red show increased severity. B] Each region was seeded in  
 9 turn and NDM was played out for all time points. Pearson's R was recorded at each time point between  
 10 the model and ALS atrophy vector. As the diffusion time increases, more and more of the pathogenic  
 11 agent escapes the seed region and enters the rest of the network. The point of maximum correlation  
 12 with measured atrophy was recorded with glass brains of measured R with spheres placed at the  
 13 centroid of each brain region, and their diameter proportional to effect size. Spheres are color coded by  
 14 lobe – frontal = purple, parietal = red, occipital = orange, temporal = cyan, subcortical = green, and  
 15 cerebellum = magenta. C] Histogram of empirical atrophy and seed region likelihood as represented by  
 16  $R_{max}$  is shown side-by-side. Precentral which is the highest atrophied region when taking the average  
 17 of empirical atrophy from left hemisphere (LH) and right hemisphere (RH) is not the best seed, thereby  
 18 suggestive of inconsequential role of higher atrophy values in determination of  $R_{max}$ . D] NDM seeded at  
 19 bilateral regions indicates that the thalamus is the one of the most plausible candidate for ALS seeding  
 20 – it has the highest peak R, and the characteristic intermediate peak indicative of true pathology spread.  
 21 Other regions among the top five that obtained the highest R were insula, pallidum, putamen, and  
 22 caudate. R-t curves for the remaining regions are shown in blue. E] Histogram of maximum R achieved  
 23 from six major regions for all individual subjects. Rmax values were attained for each of these regions  
 24 from 79 individual subjects. We can see that for most of the subjects' maximum R ( $R_{max} > 0.4$ ) was  
 25 achieved from the frontal and subcortical regions compared to other regions.

1 **Table 1:** List of regions most likely to serve as seeds of ALS pathology. Seeding likelihood of a region,  
 2 shown in the rightmost column, is denoted by the average of the highest R from both empirical atrophy  
 3 and histopathological staging. Although the precentral gyrus does not have the highest seeding  
 4 likelihood by these measures, it was included here due to its prominence as an early site in ALS.

| Region                                   | Atrophy | $R_{\max}$ (NDM vs Atrophy) | R (NDM vs ALS Staging) | Average R |
|------------------------------------------|---------|-----------------------------|------------------------|-----------|
| Insula                                   | 0.41    | 0.45                        | -0.64                  | 0.55      |
| Putamen                                  | 0.51    | 0.42                        | -0.65                  | 0.53      |
| Palladum                                 | 0.48    | 0.44                        | -0.61                  | 0.53      |
| Caudate                                  | 0.32    | 0.40                        | -0.52                  | 0.46      |
| Precentral                               | 0.59    | 0.39                        | -0.42                  | 0.40      |
| Thalamus                                 | 0.50    | 0.47                        | -0.30                  | 0.38      |
| $R_{\max}$ – Maximum Pearson Correlation |         |                             |                        |           |

5

## 6 Comparison with histopathological staging

7 Table 2 shows ALS staging for TDP-43 pathology in each region. As shown in Figure 2 MRI atrophy  
 8 and ALS staging are not highly correlated ( $R = -0.27$ ), hence we wished to assess whether our model  
 9 is also able to recapitulate *post mortem* histopathological staging. Therefore, the most likely seeding  
 10 location for NDM was determined based on criteria that worked best for both atrophy and  
 11 histopathological staging. Based on this criterion, the insula was selected as the best seed and used  
 12 to play out NDM for all subsequent analyses (Table 1). Empirical atrophy,  $\mathbf{x}_{tmax}^{In}$ , and staging maps  
 13 are shown in Figure 2A, 2B, and 2C respectively. Figure 2B shows the distribution of predicted  
 14 atrophy as determined by  $\mathbf{x}_{tmax}^{In}$ . Pathology severity in each region is proportional to the color  
 15 gradient. Regions with maximum severity as indicated by the NDM corresponded to regions in the  
 16 more advanced histopathological stages. Given that seeding from the thalamus (Th) consistently  
 17 produced the best R against empirical data (Figure 1D, Table SI-2), results were also obtained from  
 18  $\mathbf{x}_{tmax}^{Th}$  (Figure SI-1). This demonstrated bilateral volume loss mainly occurring in regions  
 19 corresponding to advanced histopathological staging.

1 **Table 2: Post mortem histopathological stages for each of 43 bilateral regions**

| Region Names            | ALS Staging | Region Names             | ALS Staging | Region Names     | ALS Staging |
|-------------------------|-------------|--------------------------|-------------|------------------|-------------|
| Bankssts                | 5           | Parsorbitalis            | 3           | CerebellumCortex | 5           |
| Caudalanteriorcingulate | 3           | Parstriangularis         | 3           | Thalamus_Proper  | 3           |
| Caudalmiddlefrontal     | 2           | Pericalcarine            | 5           | Caudate          | 3           |
| Cuneus                  | 5           | Postcentral              | 3           | Putamen          | 3           |
| Entorhinal              | 4           | Posteriorcingulate       | 5           | Pallidum         | 3           |
| Fusiform                | 5           | Precentral               | 1           | Hippocampus      | 4           |
| Inferiorparietal        | 5           | Precuneus                | 5           | Amygdala         | 4           |
| Inferiortemporal        | 5           | Rostralanteriorcingulate | 3           | Accumbensarea    | 3           |
| Isthmuscingulate        | 5           | Rostralmiddlefrontal     | 3           | Hypothalamus     | 4           |
| Lateraloccipital        | 5           | Superiorfrontal          | 2           |                  |             |
| Lateralorbitofrontal    | 3           | Superiorparietal         | 4           |                  |             |
| Lingual                 | 5           | Superiortemporal         | 4           |                  |             |
| Medialorbitofrontal     | 3           | Supramarginal            | 4           |                  |             |
| Middletemporal          | 4           | Frontalpole              | 3           |                  |             |
| Parahippocampal         | 4           | Temporalpole             | 4           |                  |             |
| Paracentral             | 3           | Transversetemporal       | 4           |                  |             |
| Parsopercularis         | 3           | Insula                   | 3           |                  |             |

2

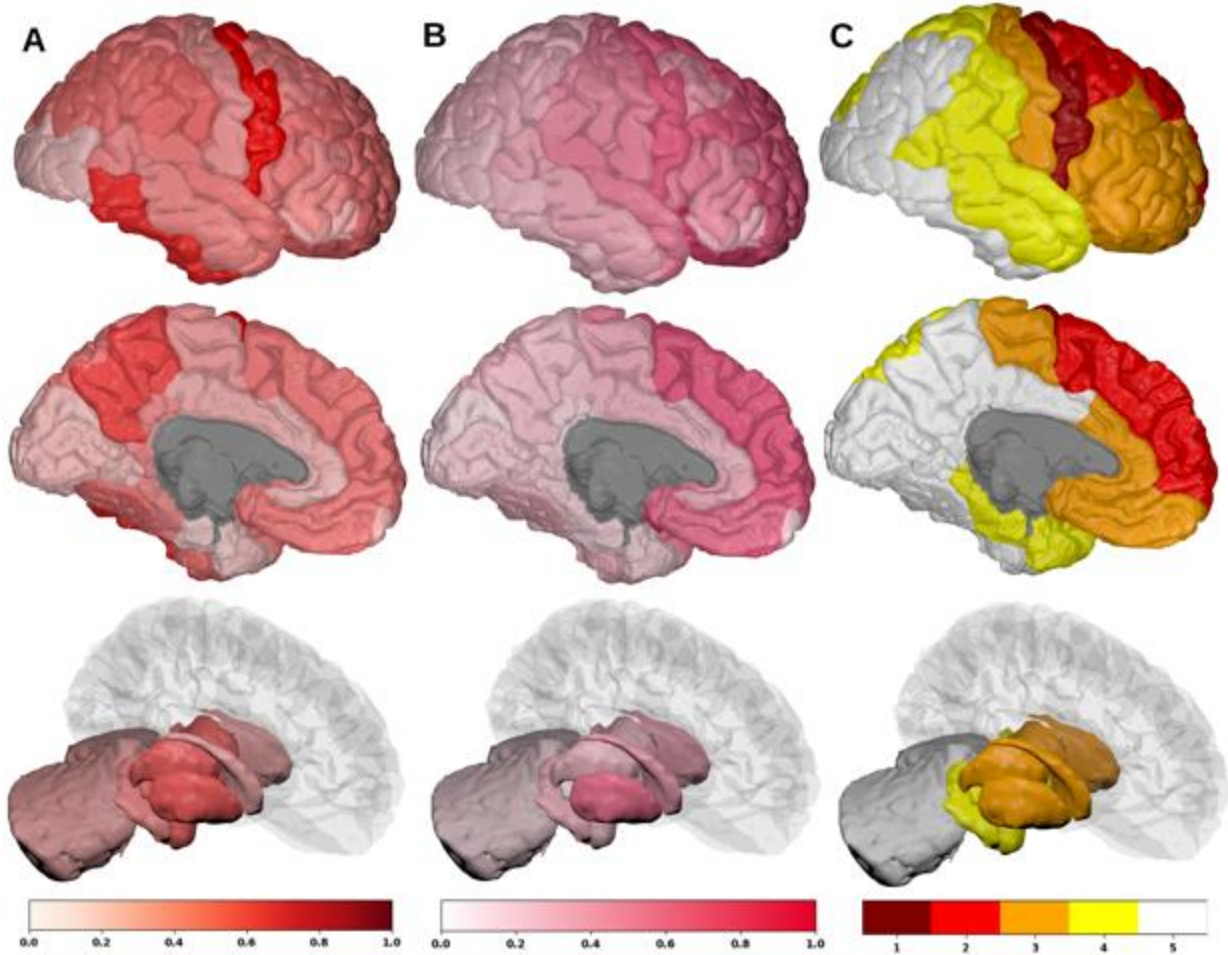

1

2 **Figure 2: Spatial distribution of ALS atrophy, NDM Predicted atrophy and histopathological**  
3 **staging.** A] Measured regional ALS atrophy are depicted by glass brain visualization. Bilateral volume  
4 loss was observed in somatosensory, frontotemporal, and subcortical regions, with most atrophy  
5 occurring in precentral gyrus, inferior temporal gyrus, precuneus, putamen, and thalamic regions.  
6 Severity of disease in each region is depicted in a color bar, where color towards red show increased  
7 severity. B] Glass brains of NDM seeded at the bilateral insula at  $t_{max} = 6.06$  au yields progression of  
8 ALS from insula to connected, subcortical, anteromedial portions of temporal lobe and frontal areas.  
9 Bilateral volume loss is mainly observed in frontal and subcortical regions, with most atrophy occurring  
10 in later orbito-frontal, superior frontal, precentral, rostral middle-frontal, and putamen regions.  
11 Severity of disease in each region is depicted in a color bar, where color towards magenta showing  
12 increased severity. C] The ALS stage from 1-4 for each of the 43 bilateral regions. Stage 1 (maroon)  
13 starts with agranular motor cortex. The next affected regions (stage 2 in red) are the premotor cortex  
14 and parts of prefrontal neocortex. The pathology then progresses into striatum and into the  
15 prefrontal/postcentral cortices (stage 3 in orange), and finally to stage 4 show (yellow) involving  
16 anteromedial portions of the temporal lobe and the hippocampus. Stage 5 shows regions in white that  
17 are not part of the published histopathological staging system.

18

## 1 **Spatiotemporal evolution of ALS atrophy**

2 The spatiotemporal evolution of ALS atrophy as recapitulated by network diffusion and evolved from  
3 the insula at model times  $t = 2,4,6$  (*au*) is shown in Figure 3. The evolution of network diffusion  
4 process seeded at the insula starts at early stage ( $t=2$ ) through mature stage ( $t=6$ ), where the  
5 maximum correspondence of NDM to empirical data occurred. Here, time is arbitrary, hence we have  
6 used “*au*” as the unit of time for illustrative purpose only. At the initial stage, the disease involves  
7 subcortical and frontal regions, followed by motor regions, and finally showing widespread  
8 involvement of extra-motor and cortical regions. A linear positive association between empirical  
9 atrophy and predicted atrophy ( $R = 0.45$ ,  $p_{\text{corr}} < 5.8 \times 10^{-4}$ ) as represented by the NDM at model times  
10  $t = 2,4,6$  (*au*) was demonstrated (Figure 3B). A linear association was found between the  
11 histopathological staging and the NDM at model times  $t = 2,4,6$  (*au*) (Figure 3C), with a negative  
12 correlation between the predicted atrophy and stage, which as model time progresses, shows  
13 increased correlation between the NDM prediction from insula-seeding and each stage ( $R = -0.66$ ,  
14  $p_{\text{corr}} < 5.8 \times 10^{-4}$ ). Similarly, we also explored spatiotemporal evolution from thalamic-seeding at  
15 model times  $t = 3,5,8$  (*au*) (Figure SI-2). With thalamic-seeding, the predicted disease course involved  
16 mainly subcortical regions at the initial stage, followed by diffusion into the frontal and motor  
17 regions.

18

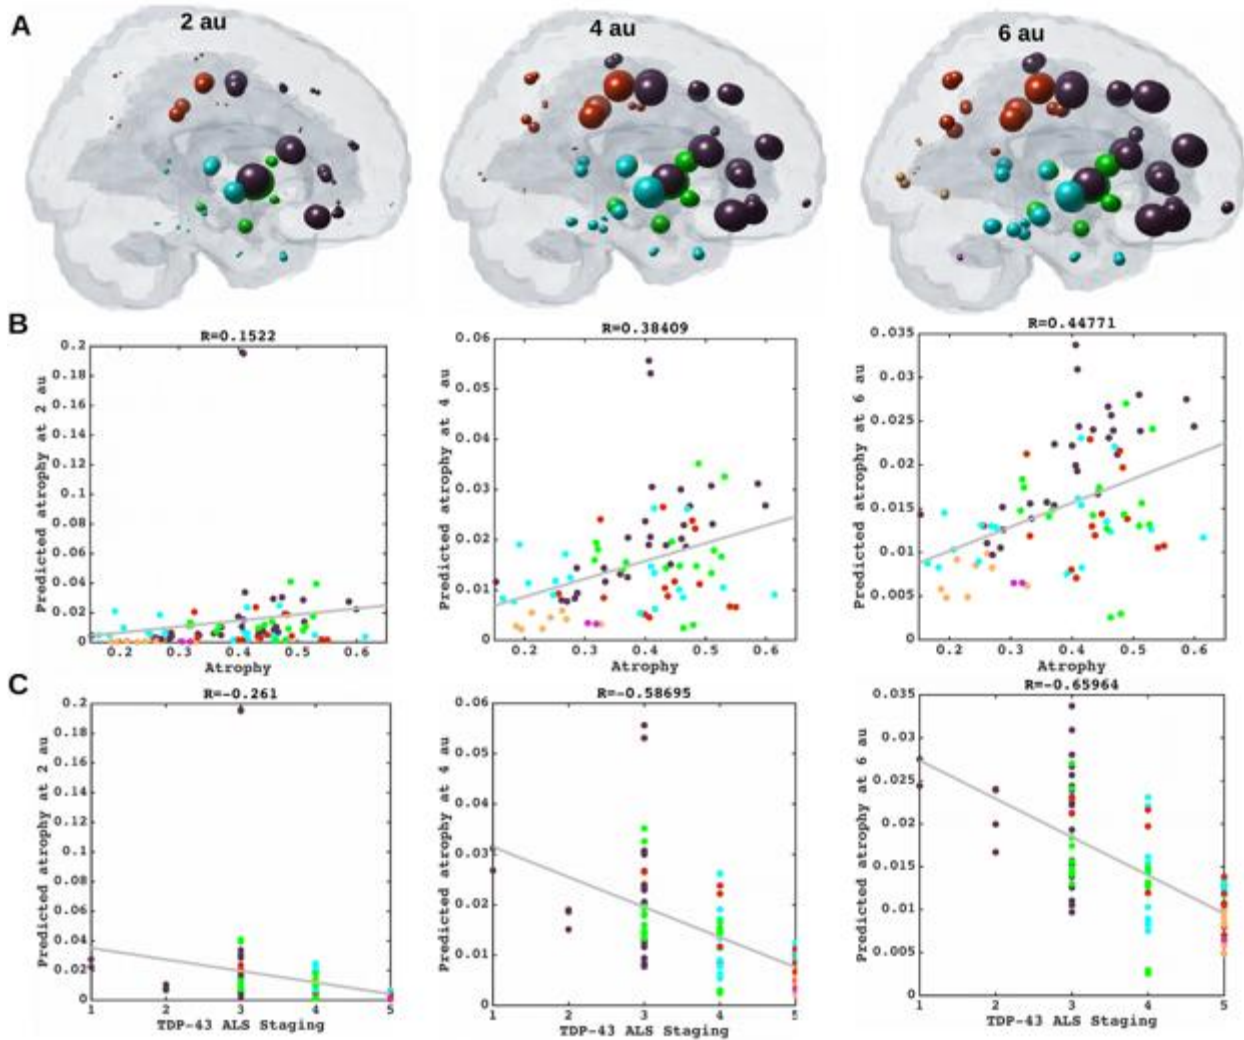

1  
2 **Figure 3: Spatiotemporal evolution, scatter plots of atrophy and histopathological staging with**  
3 **NDM at different model times.** A] Evolution of insula-seeded network diffusion at model times  $t =$   
4  $2, 4, 6$  (au) exhibited frontal involvement initially, followed by slower diffusion into the temporal, motor  
5 and subcortical cortices, and finally showing widespread involvement of cortical regions. This temporal  
6 sequencing predicted by the model suggest that volume loss in ALS involves extra-motor regions,  
7 particularly the prefrontal and subcortical regions. B] Scatter plot of NDM from insula versus empirical  
8 ALS atrophy at model times  $t = 2, 4, 6$  (au). Dots are color coded by lobe - frontal = purple; parietal =  
9 red; occipital = orange; temporal = cyan; subcortical = green; and cerebellum = magenta. A positive  
10 correlation is observed between ALS empirical atrophy and NDM predicted atrophy from bilateral  
11 insula, which increases significantly ( $R = 0.45$ ,  $p_{corr} < 5.8 \times 10^{-4}$ ,  $0.05/86$ ) at matured model times  $t =$   
12  $4, 6$  (au). C] Scatter plot of NDM from insula versus histopathological staging at model times  $t =$   
13  $2, 4, 6$  (au). Dots are color coded by lobe - frontal = purple; parietal = red; occipital = orange; temporal  
14 = cyan; subcortical = green; and cerebellum = magenta. A negative correlation was observed between  
15 the NDM and ALS staging from bilateral insula, which decreases significantly ( $R = -0.66$ ,  $p_{corr} < 5.8 \times 10^{-4}$ )  
16 at matured model times  $t = 4, 6$  (au). As time progressed, greater frontal, temporal and subcortical  
17 regions were involved with NDM closely resembling empirical ALS-FTD pathology.

## 1 Relationship of atrophy to regional ALS risk gene expression

2 The linear relationship between different categories of genes (listed in Table SI-3) and empirical  
3 atrophy was studied (Figure 4). Figure 4A shows distribution of empirical atrophy for reference.  
4 Figures 4B and 4C show scatter plots of empirical atrophy versus averages of ALS-related genes, and  
5 TDP-43 specific genes respectively. No association was found between ALS-related genes, TDP-43  
6 specific genes empirical atrophy. Further, no association was found between atrophy and TARDBP  
7 gene itself (4D), which codes for TDP-43. Figures 4E, 4F, and 4G show local distribution of average of  
8 ALS-related genes, average of TDP-43 specific genes and TARDBP, respectively. Table SI-3 shows  
9 correlations of ALS-related genes, and their PCA vs. empirical atrophy (to the left) and correlations  
10 of TDP-43 specific genes and their PCA vs. empirical atrophy (to the right). These results suggest that  
11 genes alone do not contribute to regional vulnerability, and that linear association between atrophy  
12 and gene expression profiles are complex and cannot be explained by univariate analysis of genes  
13 alone.

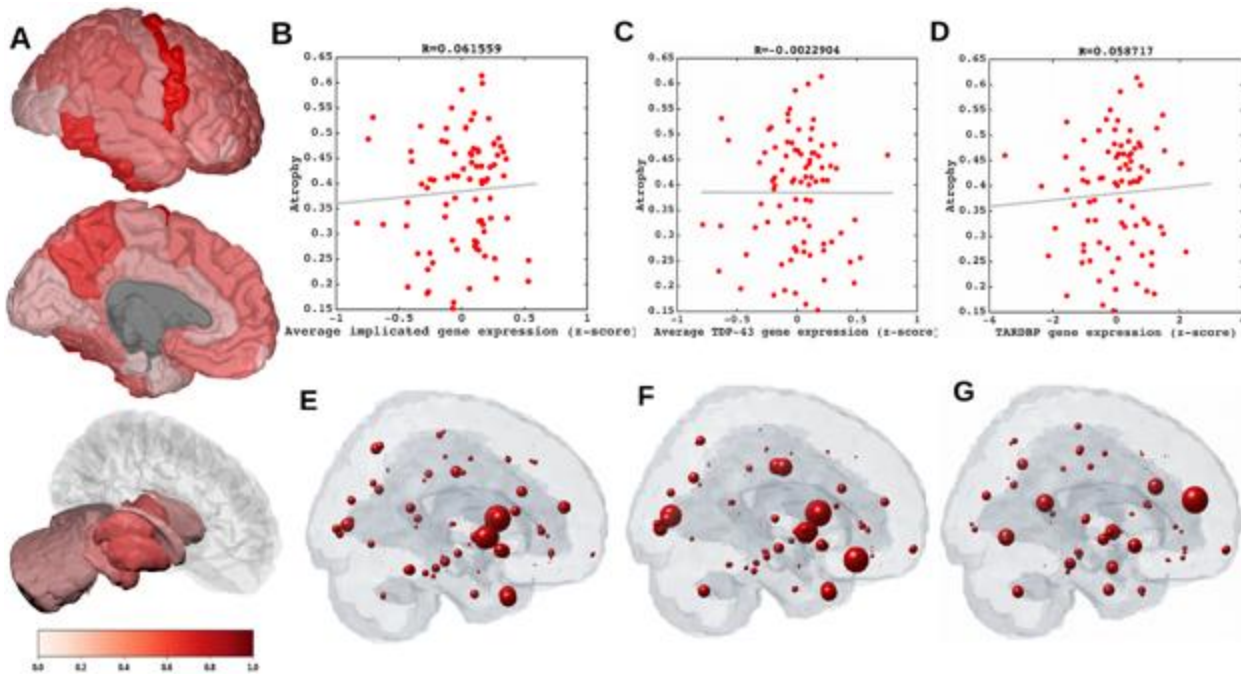

14

15 **Figure 4: Spatial distribution of ALS atrophy, scatter plots of genes vs ALS atrophy, spatial**  
16 **distribution of genes.** A] Measured regional ALS atrophy are depicted by glass brain visualization.  
17 Bilateral volume loss was observed in somatosensory, frontotemporal, and subcortical regions, with  
18 most atrophy occurring in precentral gyrus, inferior temporal gyrus, precuneus, putamen, and thalamic  
19 regions. Severity of disease in each region is depicted in a color bar, where color towards red show  
20 increased severity. B] Scatter plot of empirical atrophy vs average of all ALS-related genes shows no  
21 clear association. C] Scatter plot of empirical atrophy vs average of TDP-43 associated genes (F) shows  
22 no clear association. D] Scatter plot of empirical atrophy vs TARDBP gene expression (G) also shows no



1 *clear association – this was chosen for comparison, given that a small minority of ALS cases involve*  
2 *mutations in TARDBP. Spheres in glass brains were placed at the centroid of each brain region, and their*  
3 *diameter was proportional to effect size.*

#### 4 **NDM atrophy and regional ALS risk gene expression**

5 Although genes do not bear an association with regional atrophy directly, it is possible that they may  
6 contribute to regional atrophy along with network transmission of pathology. To test this, we used  
7 cross-validated L1 regularized regression (LASSO) feature selection to identify highly significant  
8 predictors of ALS pathology from the NDM and ALS-related genes, and those genes that might result  
9 in TDP-43 misfolding via downstream events. The model included the NDM predictor  $\mathbf{x}_{tmax}^{In}$ , 25 ALS-  
10 related genes, and 26 TDP-43 specific genes (Figure 5). Six predictors survived lowest MSE in our  
11 model as seen in Figure 5:  $\mathbf{x}_{tmax}^{In}$ \*\*, CCNF\*, UBQLN2\*, PFN1\*, and CSNK1E\* with insula-seeding,  
12 suggesting that the NDM is the best predictor of ALS atrophy, and that only few genes in addition to  
13 the NDM contribute to the spatial pattern of disease, but in a weaker capacity.

14 Given that thalamic-seeding achieved the highest R from empirical data, LASSO analysis was repeated  
15 with NDM from thalamic-seeding using  $\mathbf{x}_{tmax}^{Th}$  and different categories of genes. With thalamic-  
16 seeding of NDM, 10 predictors survived:  $\mathbf{x}_{tmax}^{Th}$ \*\*, KIF5A\*, TBK1\*, TIA1\*, BNIP1\*, CSNKIG1\*,  
17 CSNK2A1\*, CSNK2A1P\*, and CSNK2A2\* (Figure SI-3). However, again genes were far less significant  
18 contributors than NDM.

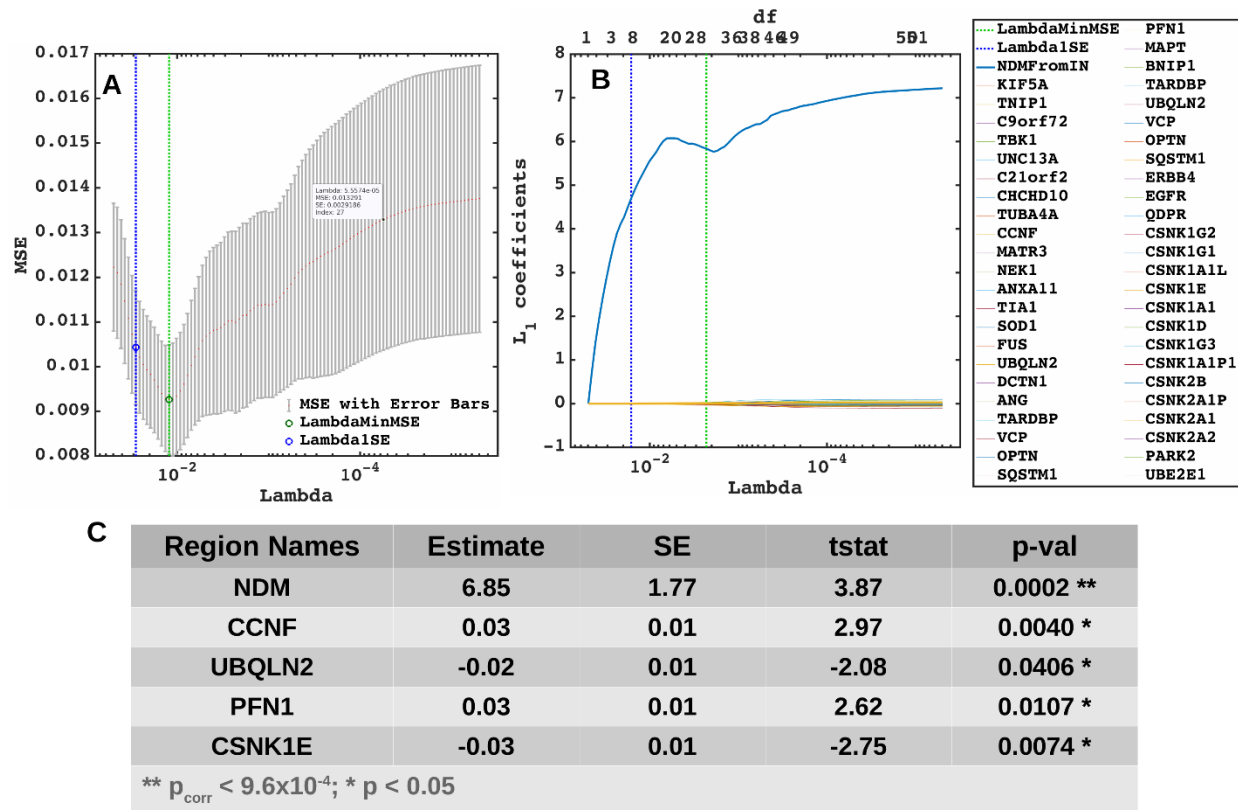

1  
 2 **Figure 5: Lasso plots and model parameters.** A] Ten-fold cross validated MSE curves for determining  
 3 regularized parameter lambda. Predictors with minimum L1 coefficient as a function of regularized  
 4 parameter lambda with no more than one standard deviation (blue dotted line) were considered to be  
 5 the most favorable. B] Cross-validated L<sub>1</sub> regularized regression coefficients as a function of tuning  
 6 parameter lambda for a model containing the NDM from insula, ALS-related genes, and genes  
 7 implicated in trans-synaptic TDP-43 transfer as predictors. Trace plot shows that as lambda increases  
 8 towards the left, lasso sets various coefficients to zero, thereby removing them from the model. C] Model  
 9 parameters and p-values of significant predictors that survived with p < 0.05 (represented with “\*”) and  
 10 with Bonferroni corrected p (represented with “\*\*”). The NDM and expression profiles of CCNF, UBQLN2,  
 11 PFN1, and CSNK1E have non-zero coefficients at minimum model MSE, indicating that these are  
 12 essential predictive variables.

### 13 NDM evaluation against alternate modelling of network connectivity and ALS atrophy

14 To test the predictive power of NDM against alternate network models, we evaluated its specificity  
 15 to ALS atrophy and to the connectome upon which it evolves. The distribution of Pearson's R over  
 16 2000 randomly simulated connectome matrices and atrophy vectors from insula and thalamic-  
 17 seeding are shown in Figure 6 and Figure SI-4 respectively. Random model's R was much lower than  
 18 the maximum R of 0.45 from insula-seeding and 0.47 from thalamic-seeding which were achieved by  
 19 the true model; statistically outside the 95% confidence interval, or p < 0.05. Hence, the reported  
 20 insula and thalamic-seeded NDM outperforms all simulated models' prediction and is unlikely to be  
 21 explained by chance.

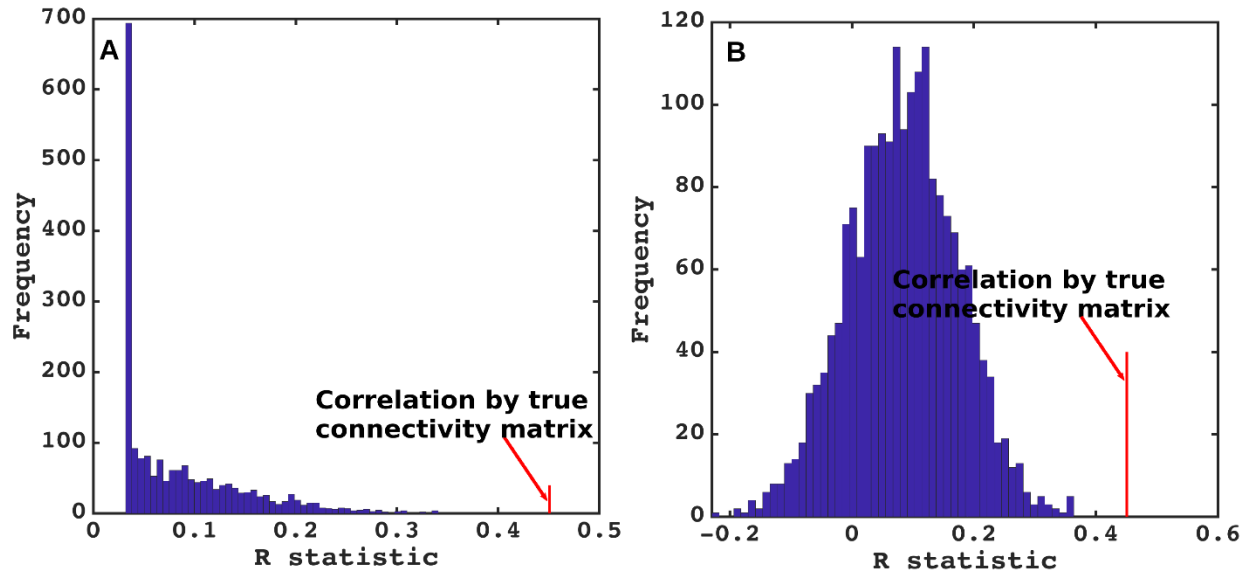

1  
2 **Figure 6: NDM evaluation against alternate models.** A] Histogram of correlation strength between  
3 NDM and ALS data over 2000 shuffled networks. There is a hard limit on the left of this plot at  $R \sim 0.03$ ,  
4 which corresponds to the zero-diffusion time value of curve in Figure 1D. B] Histogram of correlation  
5 strength between NDM and 2000 shuffled ALS data over using unshuffled structural connectome. The  
6 true connectome was shuffled by symmetrically permuting its rows and columns randomly, and the  
7 NDM was evaluated for each shuffled network after bilateral insula-seeding. The best R achieved by each  
8 model was recorded and entered into the histogram. The null models are distributed well below the true  
9 model, indicating that the latter is highly unlikely to arise by chance ( $p < 0.05$ ).

## 10 Discussion

11 Using a quantitative network-based model of pathology spread, this study sought to explore selective  
12 vulnerability and pathological progression in the ALS brain. We tested whether, setting each region  
13 of our brain atlas as the initiation site, the subsequent network spread modeled by the NDM correctly  
14 and significantly recapitulates cross-sectional patterns of regional atrophy and *post mortem*  
15 pathology staging. We also incorporated in our model the regional expression of ALS-related genes.  
16 The results support structural network-based transmission in relation to regional atrophy, but with  
17 no significant relationship to the spatial distribution of the regional expression of ALS-related genes.  
18 Intriguingly, the critical seed regions for spread within the model were not within the primary motor  
19 cortex but in basal ganglia, thalamus and insula. NDM applied to these seed regions also recapitulated  
20 the *post mortem* histopathological staging system. Within a continuous ALS-FTD clinicopathological  
21 spectrum, these non-primary motor structures may be the sites of some of the earliest cerebral  
22 pathology.

23

## 1 **Stereotyped Models of anatomical spread in ALS**

2 The focality of initial symptom onset and the non-random, typically regionally contiguous spread of  
3 symptoms in ALS was shown to be mirrored, for limb involvement at least, by spinal cord  
4 histopathology (Ravits *et al.*, 2007a, b). These data were used to infer a *theoretical* model of  
5 simultaneous cerebral focal onset and spread (Ravits and La Spada, 2009), but remain unproven. The  
6 most consistent regions of cerebral pathological involvement in ALS have been the corticospinal tract  
7 and corpus callosum (Filippini *et al.*, 2010; Müller *et al.*, 2016), but with wider extra-motor  
8 involvement at baseline and a variable extent of both grey and white matter changes in longitudinal  
9 studies (Menke *et al.*, 2014).

10 *Post mortem* studies defined a variably overlapping extent of TDP-43 pathology, arbitrarily divided  
11 into four “stages”, with presumed but as yet unproven sequential trans-axonal progression *in vivo*  
12 (Brettschneider *et al.*, 2013). In that model initial lesions were said to develop in the agranular motor  
13 cortex, in the bulbar and spinal somatomotor neurons, and the brainstem motor nuclei (stage 1). The  
14 next affected regions were the prefrontal neocortex, the brainstem reticular formation, the pre-  
15 cerebellar nuclei, and the red nucleus (stage 2), then striatum and into the prefrontal/postcentral  
16 cortices (stage 3), finally involving anteromedial portions of the temporal lobe and the hippocampus  
17 (stage 4). This pathological staging has been supported by the same group in analysis of cross-  
18 sectional *in vivo* MRI data (Gorges *et al.*, 2018).

## 19 **Role of network transmission in ALS**

20 A plausible explanation for these patterns of progression may be trans-neuronal transmission of  
21 underlying pathology, which has been hypothesized in other neurodegenerative disorders including  
22 Alzheimer’s Disease, Frontotemporal Dementia (FTD), Parkinson’s Disease, Huntington’s Disease  
23 and Creutzfeldt-Jakob disease (Spillantini *et al.*, 1998; Lee *et al.*, 2001; Neumann *et al.*, 2006; Hansen  
24 *et al.*, 2011; Herrera *et al.*, 2011; Jack and Holtzman, 2013; Jucker and Walker, 2013; Walker *et al.*,  
25 2013; Maniecka and Polymenidou, 2015; Freeze *et al.*, 2020). Concepts of seeding and self-templating  
26 of aberrant, aggregate-prone proteins have extended to ALS (Polymenidou and Cleveland, 2011),  
27 with a similar hypothesis of trans-neuronal transmission of pathogenic proteins between cells  
28 (Schmidt *et al.*, 2016; Subramaniam, 2019). These emerging concepts in ALS and FTD were  
29 comprehensively reviewed recently (Riku, 2020). Broader concepts of structural and functional  
30 networks in health have been invoked for defining patterns of neurodegeneration (Seeley *et al.*,  
31 2009). MRI studies in ALS have supported the concept that structural connectivity mediates the

1 spatial and temporal evolution of ALS atrophy and leads to network disintegration (Verstraete *et al.*,  
2 2011, 2014; Schmidt *et al.*, 2016; Bede *et al.*, 2018).

3 The present study is different from previous network studies in ALS because it does not investigate  
4 the question of whether structural connectivity networks themselves are being damaged by the  
5 disease process, but whether they serve as conduits for pathology transmission on the network.  
6 (Bede *et al.*, 2018) found that the subcortical areas that undergo the highest cell loss in ALS are  
7 dictated by their connectivity to cortical regions. This could be due to network degeneration as above,  
8 but could also point to protein transmission along connections, as explored in our study.

### 9 **Insula, basal ganglia and thalamus as potential seeding sites in ALS**

10 The critical seed regions for widespread pathological spread within our model were not in the motor  
11 cortex but in basal ganglia, thalamus and insula. Furthermore, NDM applied to these seed regions  
12 recapitulated the *post mortem* TDP43-based histopathological staging scheme. These brain regions  
13 are well connected with prominent cortical areas undergoing atrophy in ALS (Bede *et al.*, 2018). Basal  
14 ganglia involvement in ALS has been increasingly recognized (Bede *et al.*, 2013; Riku, 2020) and the  
15 thalamus in particular has been shown to reflect the wider extent of cortical involvement in ALS  
16 (Chipika *et al.*, 2020), notably in relation to the longitudinal spread of frontotemporal involvement  
17 (Tu *et al.*, 2018).

18 A speculative interpretation of our results is that such sites may be common ‘anchors’ for what is a  
19 continuous ALS-FTD spectrum; see e.g. a recent review (Riku, 2020). The frontoinsula region appears  
20 to be one of the more selectively vulnerable and perhaps earliest sites of pathology in behavioral  
21 variant FTD, from which large von Economo neurons are prominently lost (Seeley *et al.*, 2008; Kim  
22 *et al.*, 2012). Similarly, the striatum is a site of early and prominent atrophy in bvFTD (Halabi *et al.*).  
23 Pathology in these non-primary motor deep gray matter structures may progress into either  
24 predominantly motor areas in ALS patients, or frontotemporal regions in FTD. Carriers of the intronic  
25 hexanucleotide expansion in *C9orf72*, the commonest inherited form of both ALS and FTD, tend to  
26 dichotomize into a phenotype with a predominance of one or other condition, even within the same  
27 pedigree (Mahoney *et al.*, 2012), and the application of the methodology to a large cohort of such  
28 individuals might strengthen the hypothesis.

## 1 **Limitations**

2 Our study was not able to accommodate many potential disease mechanisms like oxidative stress,  
3 mitochondrial damage, metabolic dysregulation, and cell-type-specific factors, e.g. the specific role of  
4 motoneurons. The NDM is a first-order, linear model of diffusive spread that assumes that the  
5 structural connectivity network remains unchanged during disease course. Although all  
6 neurodegenerative diseases lead to aberrant structural connectivity, in practice normative  
7 connectomes as used here usually do not lead to significant reduction in the model's predictive power  
8 (Powell et al, 2017). Individual subjects' genetic variables, medication history and age of symptom  
9 onset were not analyzed.

## **ACKNOWLEDGEMENTS**

Authors convey grateful thanks to Chris Mezias and Justin Torok at Weill-Cornell, and Pablo Damasceno at UCSF for help with network and gene analysis.

## **FUNDING**

This study was supported by NIH grants NS092802 and R01AG062196 (to AR). MRT was supported by the Medical Research Council & Motor Neurone Disease Association Lady Edith Wolfson Fellowships (G0701923 & MR/K01014X/1) and the Motor Neurone Disease Association Walker Professorship.

## **COMPETING INTERESTS**

Authors report no competing interest.

## Figure legends

**Figure 7: Spatial distribution of ALS atrophy and repeated seeding.** A] Measured regional ALS atrophy are depicted by glass brain visualization. Bilateral volume loss was observed in somatosensory, frontotemporal, and subcortical regions, with most atrophy occurring in precentral gyrus, inferior temporal gyrus, precuneus, putamen, and thalamus regions. Severity of disease in each region is depicted in a color bar, where color towards red show increased severity. B] Each region was seeded in turn and NDM was played out for all time points. Pearson's R was recorded at each time point between the model and ALS atrophy vector. As the diffusion time increases, more and more of the pathogenic agent escapes the seed region and enters the rest of the network. The point of maximum correlation with measured atrophy was recorded with glass brains of measured R with spheres placed at the centroid of each brain region, and their diameter proportional to effect size. Spheres are color coded by lobe – frontal = purple, parietal = red, occipital = orange, temporal = cyan, subcortical = green, and cerebellum = magenta. C] Histogram of empirical atrophy and seed region likelihood as represented by  $R_{max}$  is shown side-by-side. Precentral which is the highest atrophied region when taking the average of empirical atrophy from left hemisphere (LH) and right hemisphere (RH) is not the best seed, thereby suggestive of inconsequential role of higher atrophy values in determination of  $R_{max}$ . D] NDM seeded at bilateral regions indicates that the thalamus is the one of the most plausible candidate for ALS seeding – it has the highest peak R, and the characteristic intermediate peak indicative of true pathology spread. Other regions among the top five that obtained the highest R were insula, pallidum, putamen, and caudate. R-t curves for the remaining regions are shown in blue. E] Histogram of maximum R achieved from six major regions for all individual subjects. Rmax values were attained for each of these regions from 79 individual subjects. We can see that for most of the subjects' maximum R ( $R_{max} > 0.4$ ) was achieved from the frontal and subcortical regions compared to other regions.

**Figure 8: Spatial distribution of ALS atrophy, NDM Predicted atrophy and histopathological staging.** A] Measured regional ALS atrophy are depicted by glass brain visualization. Bilateral volume loss was observed in somatosensory, frontotemporal, and subcortical regions, with most atrophy occurring in precentral gyrus, inferior temporal gyrus, precuneus, putamen, and thalamic regions. Severity of disease in each region is depicted in a color bar, where color towards red show increased severity. B] Glass brains of NDM seeded at the bilateral insula at  $t_{max} = 6.06$  au yields progression of ALS from insula to connected, subcortical, anteromedial portions of temporal lobe and frontal areas. Bilateral volume loss is mainly observed in frontal and subcortical regions, with most atrophy occurring in later orbito-frontal, superior frontal, precentral, rostral middle-frontal, and putamen regions. Severity of disease in each region is depicted in a color bar, where color towards magenta showing increased severity. C] The ALS stage from 1-4 for each of the 43 bilateral regions. Stage 1 (maroon) starts with agranular motor cortex. The next affected regions (stage 2 in red) are the premotor cortex and parts of prefrontal neocortex. The pathology then progresses into striatum and into the prefrontal/postcentral cortices (stage 3 in orange), and finally to stage 4 show (yellow) involving anteromedial portions of the temporal lobe and the hippocampus. Stage 5 shows regions in white that are not part of the published histopathological staging system.

**Figure 9: Spatiotemporal evolution, scatter plots of atrophy and histopathological staging with NDM at different model times.** A] Evolution of insula-seeded network diffusion at model times  $t = 2, 4, 6$  (au) exhibited frontal involvement initially, followed by slower diffusion into the temporal, motor and subcortical cortices, and finally showing widespread involvement of cortical regions. This



temporal sequencing predicted by the model suggest that volume loss in ALS involves extra-motor regions, particularly the prefrontal and subcortical regions. B] Scatter plot of NDM from insula versus empirical ALS atrophy at model times  $t = 2,4,6$  (*au*). Dots are color coded by lobe - frontal = purple; parietal = red; occipital = orange; temporal = cyan; subcortical = green; and cerebellum = magenta. A positive correlation is observed between ALS empirical atrophy and NDM predicted atrophy from bilateral insula, which increases significantly ( $R = 0.45$ ,  $p_{\text{corr}} < 5.8 \times 10^{-4}$ , 0.05/86) at matured model times  $t = 4,6$  (*au*). C] Scatter plot of NDM from insula versus histopathological staging at model times  $t = 2,4,6$  (*au*). Dots are color coded by lobe - frontal = purple; parietal = red; occipital = orange; temporal = cyan; subcortical = green; and cerebellum = magenta. A negative correlation was observed between the NDM and ALS staging from bilateral insula, which decreases significantly ( $R = -0.66$ ,  $p_{\text{corr}} < 5.8 \times 10^{-4}$ ) at matured model times  $t = 4,6$  (*au*). As time progressed, greater frontal, temporal and subcortical regions were involved with NDM closely resembling empirical ALS-FTD pathology.

**Figure 10: Spatial distribution of ALS atrophy, scatter plots of genes vs ALS atrophy, spatial distribution of genes.** A] Measured regional ALS atrophy are depicted by glass brain visualization. Bilateral volume loss was observed in somatosensory, frontotemporal, and subcortical regions, with most atrophy occurring in precentral gyrus, inferior temporal gyrus, precuneus, putamen, and thalamic regions. Severity of disease in each region is depicted in a color bar, where color towards red show increased severity. B] Scatter plot of empirical atrophy vs average of all ALS-related genes shows no clear association. C] Scatter plot of empirical atrophy vs average of TDP-43 associated genes (F) shows no clear association. D] Scatter plot of empirical atrophy vs TARDBP gene expression (G) also shows no clear association – this was chosen for comparison, given that a small minority of ALS cases involve mutations in TARDBP. Spheres in glass brains were placed at the centroid of each brain region, and their diameter was proportional to effect size.

**Figure 11: Lasso plots and model parameters.** A] Ten-fold cross validated MSE curves for determining regularized parameter lambda. Predictors with minimum L1 coefficient as a function of regularized parameter lambda with no more than one standard deviation (blue dotted line) were considered to be the most favorable. B] Cross-validated  $L_1$  regularized regression coefficients as a function of tuning parameter lambda for a model containing the NDM from insula, ALS-related genes, and genes implicated in trans-synaptic TDP-43 transfer as predictors. Trace plot shows that as lambda increases towards the left, lasso sets various coefficients to zero, thereby removing them from the model. C] Model parameters and p-values of significant predictors that survived with  $p < 0.05$  (represented with “\*”) and with Bonferroni corrected p (represented with “\*\*\*”). The NDM and expression profiles of CCNF, UBQLN2, PFN1, and CSNK1E have non-zero coefficients at minimum model MSE, indicating that these are essential predictive variables.

**Figure 12: NDM evaluation against alternate models.** A] Histogram of correlation strength between NDM and ALS data over 2000 shuffled networks. There is a hard limit on the left of this plot at  $R \sim 0.03$ , which corresponds to the zero-diffusion time value of curve in Figure 1D. B] Histogram of correlation strength between NDM and 2000 shuffled ALS data over using unshuffled structural connectome. The true connectome was shuffled by symmetrically permuting its rows and columns randomly, and the NDM was evaluated for each shuffled network after bilateral insula-seeding. The best R achieved by each model was recorded and entered into the histogram. The null models are distributed well below the true model, indicating that the latter is highly unlikely to arise by chance ( $p < 0.05$ ).

**Figure SI - 1: Spatial distribution of ALS atrophy, NDM Predicted atrophy and histopathological staging.** A] Measured regional ALS atrophy are depicted by “glass brain” visualization. Bilateral volume loss is observed in somatosensory, frontotemporal, and subcortical regions, with most atrophy occurring in precentral gyrus, inferior temporal gyrus, precuneus, putamen, and thalamic regions. Severity of disease in each region is depicted in a color bar, where color towards red show increased severity. B] Glass brains of NDM seeded at the bilateral thalamus at  $t_{max} = 8.08$  au yields progression of ALS from thalamus to connected extra-motor, subcortical and frontal areas. Bilateral volume loss is mainly observed in frontal and subcortical regions, with most atrophy occurring in insula, putamen, later orbito-frontal, superior frontal, and fusiform. Severity of disease in each region is depicted in a color bar, where color towards magenta showing increased severity. C] The ALS stage from 1-4 for each of the 43 bilateral regions. We can see that Stage 1 which is indicated by maroon starts with agranular motor cortex. The next affected regions (stage 2 in red) are the premotor cortex and parts of prefrontal neocortex. The pathology then progresses into striatum and into the prefrontal/postcentral cortices (stage 3 in orange), and finally to stage 4 show in yellow involving anteromedial portions of the temporal lobe and the hippocampus. Stage 5 denotes regions in white that are not part of ALS staging schema (i.e. outside the 4 accepted stages in ALS).

**Figure SI - 2: Spatiotemporal evolution, scatter plots of atrophy and histopathological staging with NDM at different model times.** A] Evolution of thalamic-seeded network diffusion at model times  $t = 3,5,8$  (au) exhibits subcortical areas as early affected regions, followed by somewhat slower diffusion into the motor and extra-motor cortices, specially prefrontal, and finally showing widespread involvement of cortical regions. This temporal sequencing predicted by the model suggest that volume loss in ALS involves extra-motor regions, particularly the prefrontal and subcortical regions. B] Scatter plot of NDM from thalamus versus empirical ALS atrophy at model times  $t = 3,5,8$  (au). Dots are color coded by lobe - frontal = purple; parietal = red; occipital = orange; temporal = cyan; subcortical = green; and cerebellum = magenta. A positive correlation is observed between ALS empirical atrophy and NDM predicted atrophy from bilateral thalamus, which increases significantly ( $R = 0.47$ ,  $p_{corr} < 5.8 \times 10^{-4}$ , 0.05/86) at matured model times  $t = 5,8$  (au). As time progresses, more and more frontal, temporal and extra-motor regions are involved with NDM closely resembling ALS atrophy. C] Scatter plot of NDM from thalamus versus ALS staging of TDP-43 pathology at model times  $t = 3,5,8$  (au). Dots are color coded by lobe - frontal = purple; parietal = red; occipital = orange; temporal = cyan; subcortical = green; and cerebellum = magenta. A negative correlation is observed between the NDM and ALS staging from bilateral thalamus, which decreases significantly ( $R = -0.33$ ,  $p_{corr} < 5.8 \times 10^{-4}$ ) at matured model times  $t = 5,8$  (au). As time progresses, more and more frontal, temporal and subcortical regions are involved with NDM closely resembling empirical ALS atrophy.

**Figure SI - 3: Lasso plots and model parameters.** A] Ten-fold cross validated MSE curves for determining regularized parameter lambda. Predictors with minimum L1 coefficient as a function of regularized parameter lambda with no more than one standard deviation (blue dotted line) were considered to be the most favorable. B] Cross-validated  $L_1$  regularized regression coefficients as a function of tuning parameter lambda for a model containing the NDM from thalamus, ALS-related genes, and genes implicated in trans-synaptic TDP-43 transfer as predictors. Trace plot shows that’s as lambda increases towards the left, lasso sets various coefficients to zero, thereby removing them from the model. C] Model parameters and p-values of significant predictors that survived with  $p < 0.05$  (represented with “\*”) and with Bonferroni corrected p (represented with “\*\*\*”). The NDM and expression profiles of KIF5A, TBK1, TIA1, BNIP1, CSNK1G1, CSNKID, CSNK2A1, CSNK2A1P, and

CSNK2A2 have non-zero coefficients at minimum model MSE, indicating that these are essential predictive variables.

**Figure SI - 4: NDM evaluation against alternate models.** A] Histogram of correlation strength between NDM and ALS data over 2000 shuffled networks. There is a hard limit on the left of this plot at  $R \sim 0.15$ , which corresponds to the zero-diffusion time value of curve in Figure 1D. B] Histogram of correlation strength between NDM and 2000 shuffled ALS data over using unshuffled structural connectome. The true connectome was shuffled by symmetrically permuting its rows and columns randomly, and the NDM was evaluated for each shuffled network after bilateral thalamic-seeding. The best R achieved by each model was recorded and entered into the histogram. The null models are distributed well below the true model, indicating that the latter is highly unlikely to arise by chance ( $p < 0.05$ ).

## REFERENCES

- Agosta F, Chiò A, Cosottini M, De Stefano N, Falini A, Mascalchi M, et al. The Present and the Future of Neuroimaging in Amyotrophic Lateral Sclerosis. *Am. J. Neuroradiol.* 2010; 31: 1769–1777.
- Bede P, Elamin M, Byrne S, McLaughlin RL, Kenna K, Vajda A, et al. Basal ganglia involvement in amyotrophic lateral sclerosis. *Neurology* 2013; 81: 2107–2115.
- Bede P, Omer T, Finegan E, Chipika RH, Iyer PM, Doherty MA, et al. Connectivity-based characterisation of subcortical grey matter pathology in frontotemporal dementia and ALS: a multimodal neuroimaging study. *Brain Imaging Behav.* 2018; 12: 1696–1707.
- Brettschneider J, Del Tredici K, Toledo JB, Robinson JL, Irwin DJ, Grossman M, et al. Stages of pTDP-43 pathology in amyotrophic lateral sclerosis. *Ann. Neurol.* 2013; 74: 20–38.
- Chia R, Chiò A, Traynor BJ. Novel genes associated with amyotrophic lateral sclerosis: diagnostic and clinical implications. *Lancet. Neurol.* 2018; 17: 94–102.
- Chiò A, Pagani M, Agosta F, Calvo A, Cistaro A, Filippi M. Neuroimaging in amyotrophic lateral sclerosis: insights into structural and functional changes. *Lancet. Neurol.* 2014; 13: 1228–40.
- Chipika RH, Finegan E, Li Hi Shing S, McKenna MC, Christidi F, Ming Chang K, et al. “Switchboard” malfunction in motor neuron diseases: selective pathology of thalamic nuclei in amyotrophic lateral sclerosis and primary lateral sclerosis. *NeuroImage Clin.* 2020: 102300.
- Es M van, Hardiman O, Chio A, Al-Chalabi A, Pasterkamp RJ, Veldink JJH, et al. Amyotrophic lateral sclerosis. *Lancet* 2017; 390: 2084–2098.
- Filippini N, Douaud G, Mackay CE, Knight S, Talbot K, Turner MR. Corpus callosum involvement is a consistent feature of amyotrophic lateral sclerosis. *Neurology* 2010; 75: 1645–1652.
- Freeze B, Acosta D, Pandya S, Zhao Y, Raj A. Regional expression of genes mediating trans-synaptic alpha-synuclein transfer predicts regional atrophy in Parkinson disease. *NeuroImage Clin.* 2018; 18: 456–466.
- Freeze B, Maia P, Pandya S, Raj A. Network mediation of pathology pattern in sporadic Creutzfeldt-Jakob disease [Internet]. *Brain Commun.* 2020 Available from: <https://academic.oup.com/braincomms/advance-article/doi/10.1093/braincomms/fcaa060/5837663>

Freeze B, Pandya S, Zeighami Y, Raj A. Regional transcriptional architecture of Parkinson's disease pathogenesis and network spread. *Brain* 2019; 142: 3072–3085.

Fusco FR, Chen Q, Lamoreaux WJ, Figueredo-Cardenas G, Jiao Y, Coffman JA, et al. Cellular localization of huntingtin in striatal and cortical neurons in rats: Lack of correlation with neuronal vulnerability in Huntington's disease. *J. Neurosci.* 1999; 19: 1189–1202.

Gorges M, Del Tredici K, Dreyhaupt J, Braak H, Ludolph AC, Müller H-P, et al. Corticoefferent pathology distribution in amyotrophic lateral sclerosis: in vivo evidence from a meta-analysis of diffusion tensor imaging data. *Sci. Rep.* 2018; 8: 15389.

Grosskreutz J, Kaufmann J, Frädrich J, Dengler R, Heinze H-J, Peschel T. Widespread sensorimotor and frontal cortical atrophy in Amyotrophic Lateral Sclerosis. *BMC Neurol.* 2006; 6: 17.

Halabi C, Halabi A, Dean DL, Wang P-N, Boxer AL, Trojanowski JQ, et al. Patterns of striatal degeneration in frontotemporal dementia. *Alzheimer Dis. Assoc. Disord.*; 27: 74–83.

Hansen C, Angot E, Bergström A-L, Steiner JA, Pieri L, Paul G, et al.  $\alpha$ -Synuclein propagates from mouse brain to grafted dopaminergic neurons and seeds aggregation in cultured human cells. *J. Clin. Invest.* 2011; 121: 715–25.

Hawrylycz MJ, Lein ES, Guillozet-Bongaarts AL, Shen EH, Ng L, Miller JA, et al. An anatomically comprehensive atlas of the adult human brain transcriptome. *Nature* 2012; 489: 391–399.

Herrera F, Tenreiro S, Miller-Fleming L, Outeiro TF. Visualization of cell-to-cell transmission of mutant huntingtin oligomers. *PLoS Curr.* 2011

Iturria-Medina Y, Canales-Rodríguez EJ, Melie-García L, Valdés-Hernández PA, Martínez-Montes E, Alemán-Gómez Y, et al. Characterizing brain anatomical connections using diffusion weighted MRI and graph theory. *Neuroimage* 2007; 36: 645–660.

Jack CR, Holtzman DM. Biomarker Modeling of Alzheimer's Disease. *Neuron* 2013; 80: 1347–1358.

Jackson WS. Selective vulnerability to neurodegenerative disease: The curious case of Prion Protein. *DMM Dis. Model. Mech.* 2014; 7: 21–29.

Jucker M, Walker LC. Self-propagation of pathogenic protein aggregates in neurodegenerative diseases. *Nature* 2013; 501: 45–51.

Karch CM, Wen N, Fan CC, Yokoyama JS, Kouri N, Ross OA, et al. Selective Genetic Overlap Between

Amyotrophic Lateral Sclerosis and Diseases of the Frontotemporal Dementia Spectrum. *JAMA Neurol.* 2018; 75: 860–875.

Kassubek J, Unrath A, Huppertz H, Lulé D, Ethofer T, Sperfeld A, et al. Global brain atrophy and corticospinal tract alterations in ALS, as investigated by voxel-based morphometry of 3-D MRI. *Amyotroph. Lateral Scler.* 2005; 6: 213–220.

Kim E-J, Sidhu M, Gaus SE, Huang EJ, Hof PR, Miller BL, et al. Selective frontoinsular von Economo neuron and fork cell loss in early behavioral variant frontotemporal dementia. *Cereb. Cortex* 2012; 22: 251–9.

Kuceyeski A, Maruta J, Relkin N, Raj A. The Network Modification (NeMo) Tool: elucidating the effect of white matter integrity changes on cortical and subcortical structural connectivity. *Brain Connect.* 2013; 3: 451–63.

Lee VM-Y, Goedert M, Trojanowski JQ. Neurodegenerative Tauopathies. *Annu. Rev. Neurosci.* 2001; 24: 1121–1159.

LoCastro E, Kuceyeski A, Raj A. Brainography: An Atlas-Independent Surface and Network Rendering Tool for Neural Connectivity Visualization. *Neuroinformatics* 2014; 12: 355–359.

Mahoney CJ, Beck J, Rohrer JD, Lashley T, Mok K, Shakespeare T, et al. Frontotemporal dementia with the C9ORF72 hexanucleotide repeat expansion: clinical, neuroanatomical and neuropathological features. *Brain* 2012; 135: 736–750.

Maniecka Z, Polymenidou M. From nucleation to widespread propagation: A prion-like concept for ALS. *Virus Res.* 2015; 207: 94–105.

Marinescu R V., Eshaghi A, Alexander DC, Golland P. BrainPainter: A Software for the Visualisation of Brain Structures, Biomarkers and Associated Pathological Processes. 2019. p. 112–120.

Menke RAL, Agosta F, Grosskreutz J, Filippi M, Turner MR. Neuroimaging Endpoints in Amyotrophic Lateral Sclerosis. *Neurotherapeutics* 2017; 14: 11–23.

Menke RAL, Körner S, Filippini N, Douaud G, Knight S, Talbot K, et al. Widespread grey matter pathology dominates the longitudinal cerebral MRI and clinical landscape of amyotrophic lateral sclerosis. *Brain* 2014; 137: 2546–55.

Menke RAL, Proudfoot M, Talbot K, Turner MR. The two-year progression of structural and functional cerebral MRI in amyotrophic lateral sclerosis. *NeuroImage Clin.* 2018; 17: 953–961.

Mezzapesa DM, Ceccarelli A, Dicuonzo F, Carella A, De Caro MF, Lopez M, et al. Whole-brain and regional brain atrophy in amyotrophic lateral sclerosis. *AJNR. Am. J. Neuroradiol.* 2007; 28: 255–9.

Müller H-P, Turner MR, Grosskreutz J, Abrahams S, Bede P, Govind V, et al. A large-scale multicentre cerebral diffusion tensor imaging study in amyotrophic lateral sclerosis. *J. Neurol. Neurosurg. Psychiatry* 2016; 87: 570–579.

Neumann M, Sampathu DM, Kwong LK, Truax AC, Micsenyi MC, Chou TT, et al. Ubiquitinated TDP-43 in Frontotemporal Lobar Degeneration and Amyotrophic Lateral Sclerosis. *Science (80-. )*. 2006; 314: 130–133.

Nicolas A, Kenna KP, Renton AE, Ticozzi N, Faghri F, Chia R, et al. Genome-wide Analyses Identify KIF5A as a Novel ALS Gene. *Neuron* 2018; 97: 1268-1283.e6.

Pandya S, Meziar C, Raj A. Predictive model of spread of progressive supranuclear palsy using directional network diffusion. *Front. Neurol.* 2017; 8

Pandya S, Zeighami Y, Freeze B, Dadar M, Collins DL, Dagher A, et al. Predictive model of spread of Parkinson's pathology using network diffusion. *Neuroimage* 2019; 192: 178–194.

Philips T, Rothstein JD. Glial cells in amyotrophic lateral sclerosis. *Exp. Neurol.* 2014; 262: 111–120.

Polymenidou M, Cleveland DW. The seeds of neurodegeneration: prion-like spreading in ALS. *Cell* 2011; 147: 498–508.

Poudel GR, Harding IH, Egan GF, Georgiou-Karistianis N. Network spread determines severity of degeneration and disconnection in Huntington's disease. *Hum. Brain Mapp.* 2019; 40: 4192–4201.

Raj A, Kuceyeski A, Weiner M. A Network Diffusion Model of Disease Progression in Dementia [Internet]. *Neuron* 2012 Available from:

<https://www.ncbi.nlm.nih.gov/pmc/articles/PMC3623298/>

Raj A, LoCastro E, Kuceyeski A, Tosun D, Relkin N, Weiner M. Network Diffusion Model of Progression Predicts Longitudinal Patterns of Atrophy and Metabolism in Alzheimer's Disease. *Cell Rep.* 2015; 10: 359–369.

Ravits J, Laurie P, Fan Y, Moore DH. Implications of ALS focality: Rostral-caudal distribution of lower motor neuron loss postmortem. *Neurology* 2007a; 68: 1576–1582.

Ravits J, Paul P, Jorg C. Focality of upper and lower motor neuron degeneration at the clinical onset

of ALS. *Neurology* 2007b; 68: 1571–1575.

Ravits JM, La Spada AR. ALS motor phenotype heterogeneity, focality, and spread: Deconstructing motor neuron degeneration. *Neurology* 2009; 73: 805–811.

Riku Y. Reappraisal of the anatomical spreading and propagation hypothesis about TDP-43 aggregation in amyotrophic lateral sclerosis and frontotemporal lobar degeneration. In: *Neuropathology*. Blackwell Publishing; 2020.

Robberecht W, Eykens C. The genetic basis of amyotrophic lateral sclerosis: recent breakthroughs. *Adv. Genomics Genet.* 2015; 5: 327.

Schmidt R, de Reus MA, Scholtens LH, van den Berg LH, van den Heuvel MP. Simulating disease propagation across white matter connectome reveals anatomical substrate for neuropathology staging in amyotrophic lateral sclerosis. *Neuroimage* 2016; 124: 762–769.

Scotter EL, Chen H-J, Shaw CE. TDP-43 Proteinopathy and ALS: Insights into Disease Mechanisms and Therapeutic Targets. *Neurotherapeutics* 2015; 12: 352–363.

Seeley WW, Crawford R, Rascofsky K, Kramer JH, Weiner M, Miller BL, et al. Frontal paralimbic network atrophy in very mild behavioral variant frontotemporal dementia. *Arch. Neurol.* 2008; 65: 249–55.

Seeley WW, Crawford RK, Zhou J, Miller BL, Greicius MD. Neurodegenerative Diseases Target Large-Scale Human Brain Networks. *Neuron* 2009; 62: 42–52.

Smith BN, Topp SD, Fallini C, Shibata H, Chen H-J, Troakes C, et al. Mutations in the vesicular trafficking protein annexin A11 are associated with amyotrophic lateral sclerosis. [Internet]. *Sci. Transl. Med.* 2017; 9 Available from: <http://www.ncbi.nlm.nih.gov/pubmed/28469040>

Spillantini MG, Crowther RA, Jakes R, Hasegawa M, Goedert M.  $\alpha$ -Synuclein in filamentous inclusions of Lewy bodies from Parkinson's disease and dementia with Lewy bodies. *Proc. Natl. Acad. Sci. U. S. A.* 1998; 95: 6469–6473.

Subramaniam S. Selective neuronal death in neurodegenerative diseases: The ongoing mystery. *Yale J. Biol. Med.* 2019; 92: 695–705.

Talbot K, Feneberg E, Scaber J, Thompson AG, Turner MR. Amyotrophic lateral sclerosis: the complex path to precision medicine. *J. Neurol.* 2018; 265: 2454–2462.



Tu S, Menke RAL, Talbot K, Kiernan MC, Turner MR. Regional thalamic MRI as a marker of widespread cortical pathology and progressive frontotemporal involvement in amyotrophic lateral sclerosis. *J. Neurol. Neurosurg. Psychiatry* 2018; 89: 1250–1258.

Turner MR, Bowser R, Bruijn L, Dupuis L, Ludolph A, McGrath M, et al. Mechanisms, models and biomarkers in amyotrophic lateral sclerosis. *Amyotroph. Lateral Scler. Front. Degener.* 2013; 14: 19–32.

Turner MR, Brockington A, Scaber J, Hollinger H, Marsden R, Shaw PJ, et al. Pattern of spread and prognosis in lower limb-onset ALS. *Amyotroph. Lateral Scler.* 2010; 11: 369–373.

Turner MR, Swash M. The expanding syndrome of amyotrophic lateral sclerosis: a clinical and molecular odyssey. *J. Neurol. Neurosurg. Psychiatry* 2015; 86: 667–673.

Vajda A, McLaughlin RL, Heverin M, Thorpe O, Abrahams S, Al-Chalabi A, et al. Genetic testing in ALS: A survey of current practices. *Neurology* 2017; 88: 991–999.

Verstraete E, Veldink JH, van den Berg LH, Van den Heuvel MP. Structural brain network imaging shows expanding disconnection of the motor system in amyotrophic lateral sclerosis. *Hum. Brain Mapp.* 2014; 35: 1351–1361.

Verstraete E, Veldink JH, Mandl RC, van den Berg LH, van den Heuvel MP. Impaired structural motor connectome in amyotrophic lateral sclerosis. *PLoS One* 2011; 6: e24239.

Walker LC, Diamond MI, Duff KE, Hyman BT. Mechanisms of protein seeding in neurodegenerative diseases. *JAMA Neurol.* 2013; 70: 304–10.

Westeneng H-J, Verstraete E, Walhout R, Schmidt R, Hendrikse J, Veldink JH, et al. Subcortical structures in amyotrophic lateral sclerosis. *Neurobiol. Aging* 2015; 36: 1075–1082.

## Supplementary Information

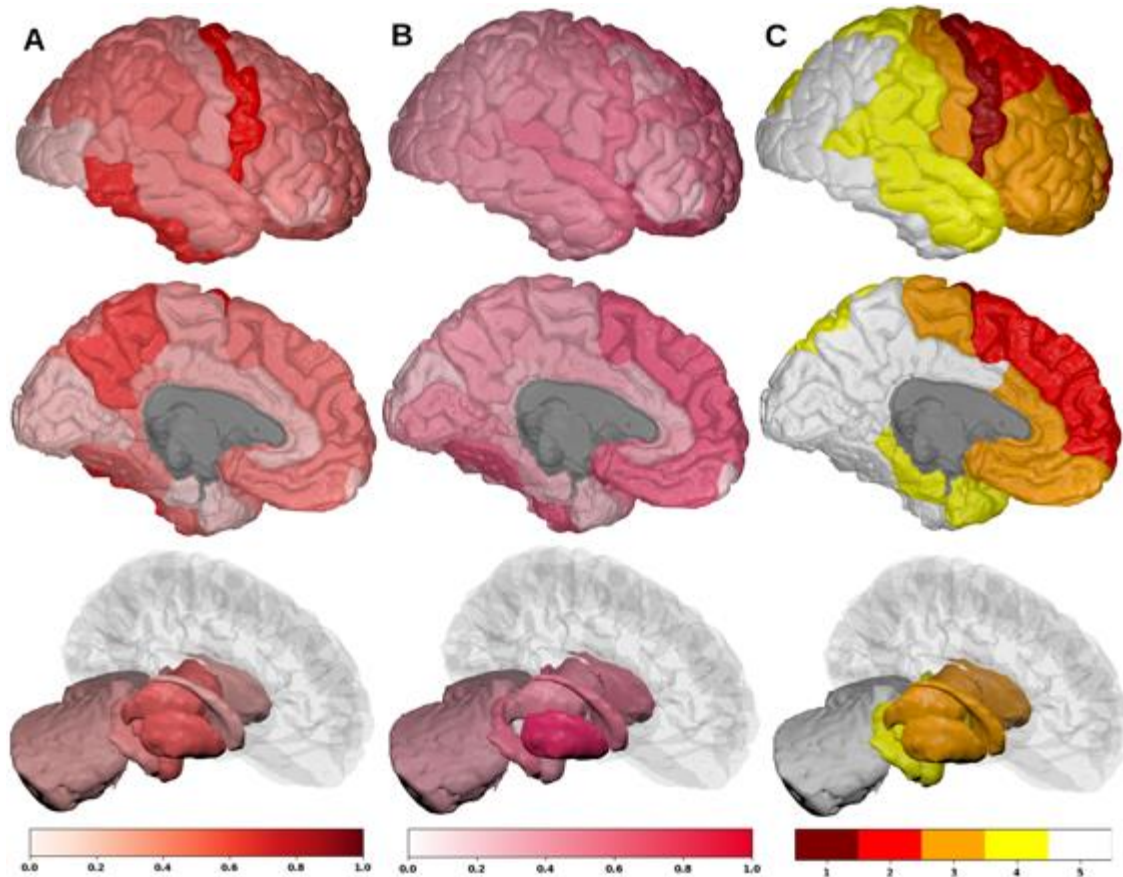

**Figure SI - 5: Spatial distribution of ALS atrophy, NDM Predicted atrophy and histopathological staging.** A] Measured regional ALS atrophy are depicted by “glass brain” visualization. Bilateral volume loss is observed in somatosensory, frontotemporal, and subcortical regions, with most atrophy occurring in precentral gyrus, inferior temporal gyrus, precuneus, putamen, and thalamic regions. Severity of disease in each region is depicted in a color bar, where color towards red show increased severity. B] Glass brains of NDM seeded at the bilateral thalamus at  $t_{max} = 8.08$  au yields progression of ALS from thalamus to connected extra-motor, subcortical and frontal areas. Bilateral volume loss is mainly observed in frontal and subcortical regions, with most atrophy occurring in insula, putamen, later orbito-frontal, superior frontal, and fusiform. Severity of disease in each region is depicted in a color bar, where color towards magenta showing increased severity. C] The ALS stage from 1-4 for each of the 43 bilateral regions. We can see that Stage 1 which is indicated by maroon starts with agranular motor cortex. The next affected regions (stage 2 in red) are the premotor cortex and parts of prefrontal neocortex. The pathology then progresses into striatum and into the prefrontal/postcentral cortices (stage 3 in orange), and finally to stage 4 show in yellow involving anteromedial portions of the temporal lobe and the hippocampus. Stage 5 denotes regions in white that are not part of ALS staging schema (i.e. outside the 4 accepted stages in ALS).

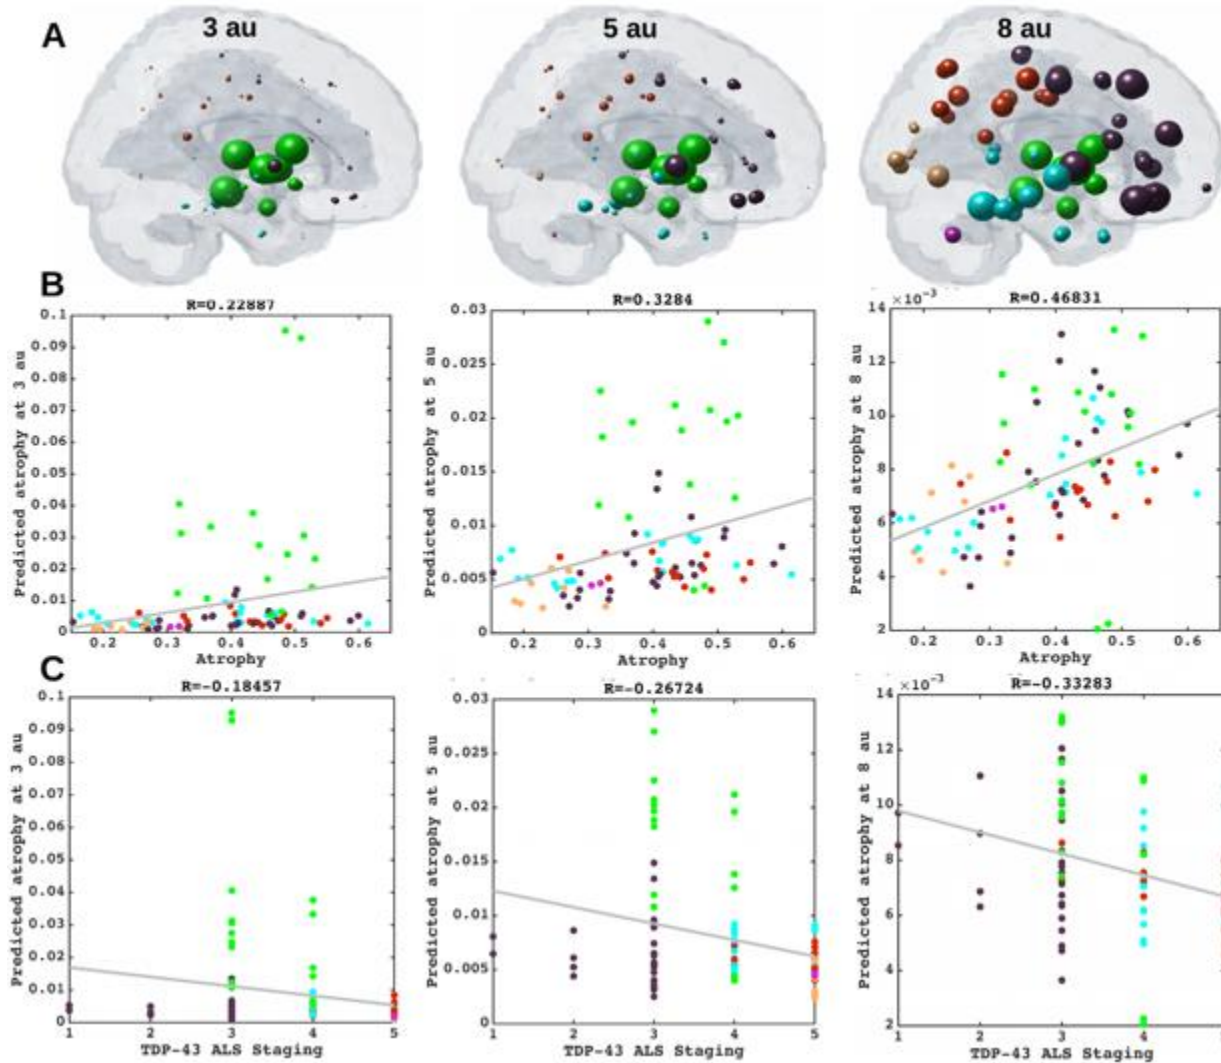

**Figure SI - 6: Spatiotemporal evolution, scatter plots of atrophy and histopathological staging with NDM at different model times.** A] Evolution of thalamic-seeded network diffusion at model times  $t = 3, 5, 8$  (au) exhibits subcortical areas as early affected regions, followed by somewhat slower diffusion into the motor and extra-motor cortices, specially prefrontal, and finally showing widespread involvement of cortical regions. This temporal sequencing predicted by the model suggest that volume loss in ALS involves extra-motor regions, particularly the prefrontal and subcortical regions. B] Scatter plot of NDM from thalamus versus empirical ALS atrophy at model times  $t = 3, 5, 8$  (au). Dots are color coded by lobe - frontal = purple; parietal = red; occipital = orange; temporal = cyan; subcortical = green; and cerebellum = magenta. A positive correlation is observed between ALS empirical atrophy and NDM predicted atrophy from bilateral thalamus, which increases significantly ( $R = 0.47$ ,  $p_{corr} < 5.8 \times 10^{-4}$ ,  $0.05/86$ ) at matured model times  $t = 5, 8$  (au). As time progresses, more and more frontal, temporal and extra-motor regions are involved with NDM closely resembling ALS atrophy. C] Scatter plot of NDM from thalamus versus ALS staging of TDP-43 pathology at model times  $t = 3, 5, 8$  (au). Dots are color coded by lobe - frontal = purple; parietal = red; occipital = orange; temporal = cyan; subcortical = green; and cerebellum = magenta. A negative correlation is observed between the NDM and ALS staging from bilateral thalamus, which decreases significantly ( $R = -0.33$ ,  $p_{corr} < 5.8 \times 10^{-4}$ ) at matured model times  $t =$

5,8 (au). As time progresses, more and more frontal, temporal and subcortical regions are involved with NDM closely resembling empirical ALS atrophy.

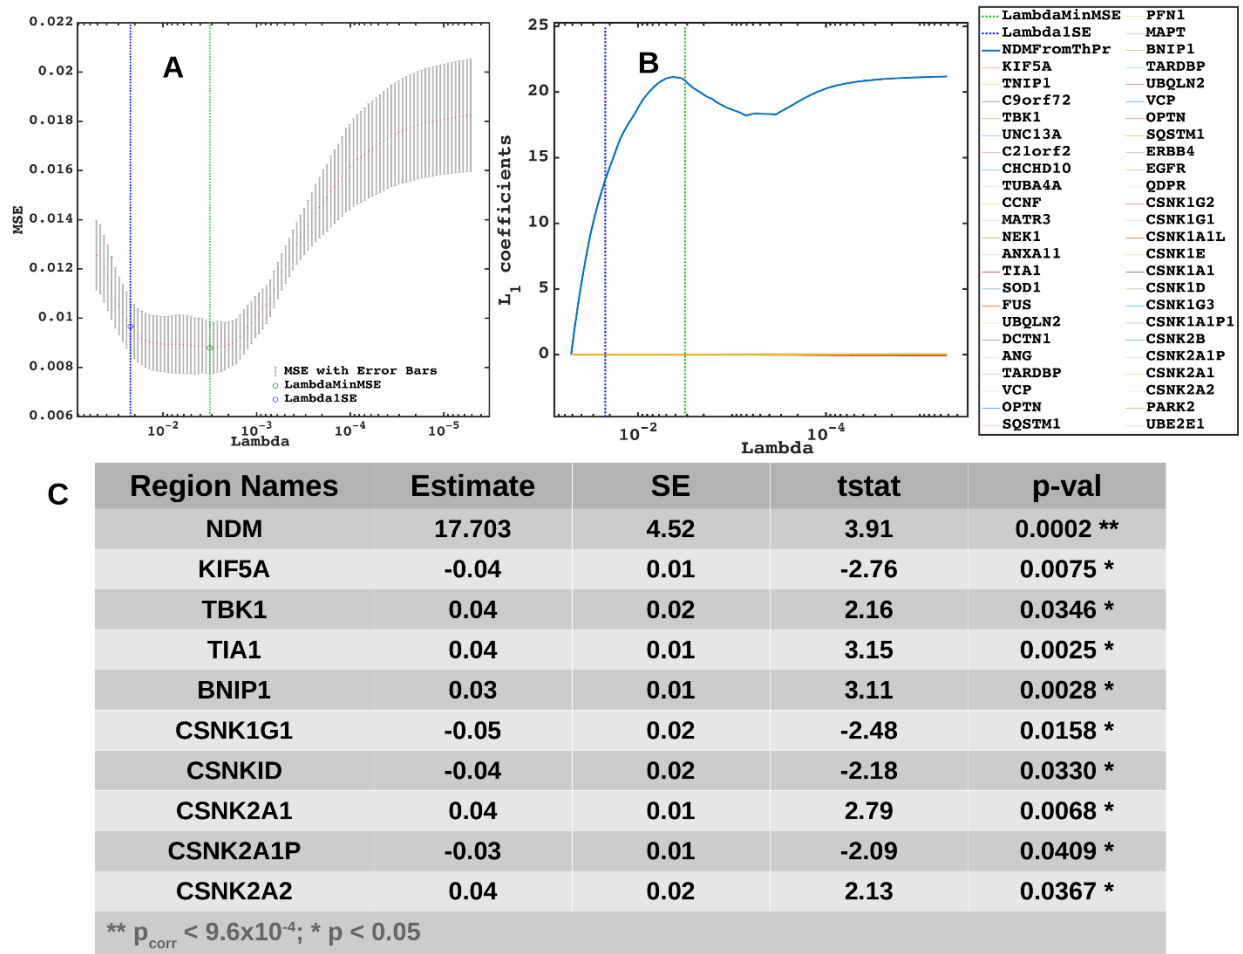

**Figure SI - 7: Lasso plots and model parameters.** A] Ten-fold cross validated MSE curves for determining regularized parameter lambda. Predictors with minimum L1 coefficient as a function of regularized parameter lambda with no more than one standard deviation (blue dotted line) were considered to be the most favorable. B] Cross-validated  $L_1$  regularized regression coefficients as a function of tuning parameter lambda for a model containing the NDM from thalamus, ALS-related genes, and genes implicated in trans-synaptic TDP-43 transfer as predictors. Trace plot shows that's as lambda increases towards the left, lasso sets various coefficients to zero, thereby removing them from the model. C] Model parameters and p-values of significant predictors that survived with  $p < 0.05$  (represented with "\*") and with Bonferroni corrected p (represented with "\*\*"). The NDM and expression profiles of KIF5A, TBK1, TIA1, BNIP1, CSNK1G1, CSNKID, CSNK2A1, CSNK2A1P, and CSNK2A2 have non-zero coefficients at minimum model MSE, indicating that these are essential predictive variables.

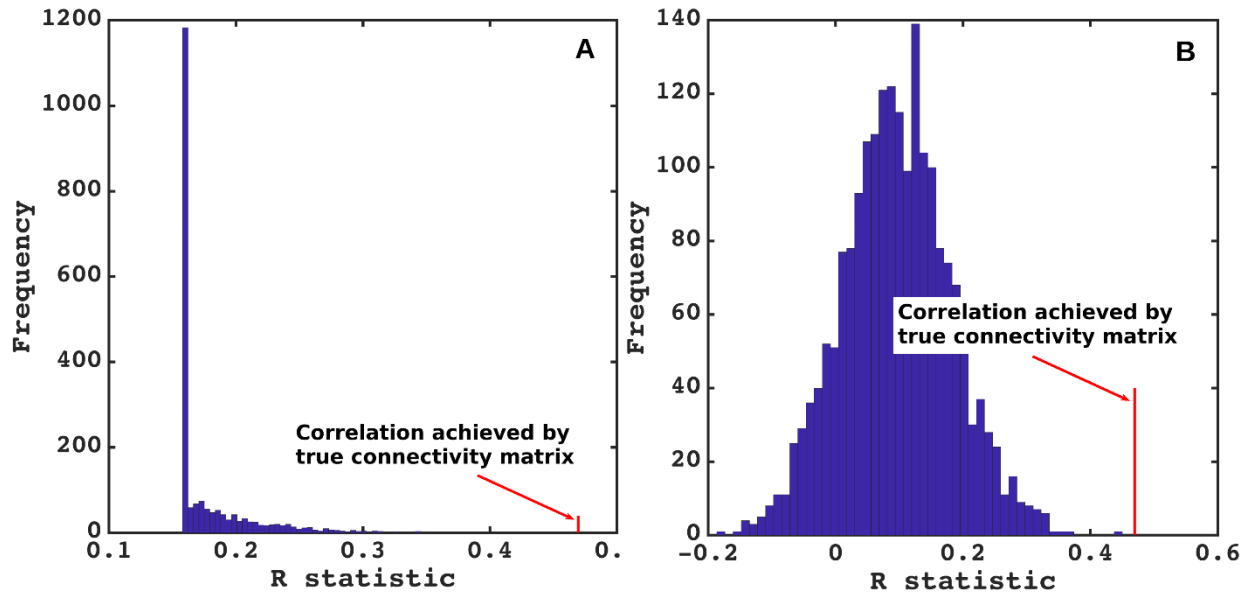

**Figure SI - 8: NDM evaluation against alternate models.** A] Histogram of correlation strength between NDM and ALS data over 2000 shuffled networks. There is a hard limit on the left of this plot at  $R \sim 0.15$ , which corresponds to the zero-diffusion time value of curve in Figure 1D. B] Histogram of correlation strength between NDM and 2000 shuffled ALS data over using unshuffled structural connectome. The true connectome was shuffled by symmetrically permuting its rows and columns randomly, and the NDM was evaluated for each shuffled network after bilateral thalamic-seeding. The best  $R$  achieved by each model was recorded and entered into the histogram. The null models are distributed well below the true model, indicating that the latter is highly unlikely to arise by chance ( $p < 0.05$ ).

*Table SI - 1: Empirical atrophy of top 20 regions (average of both left and right hemispheres)*

| <b>Region Names</b>  | <b>Average empirical atrophy</b> |
|----------------------|----------------------------------|
| Precentral           | 0.5929                           |
| Inferiortemporal     | 0.5717                           |
| Precuneus            | 0.5451                           |
| Putamen              | 0.5099                           |
| ThalamusProper       | 0.4972                           |
| Amygdala             | 0.4918                           |
| Lateralorbitofrontal | 0.4843                           |
| Supramarginal        | 0.4804                           |
| Pallidum             | 0.4790                           |
| Hypothalamus         | 0.4714                           |
| Rostralmiddlefrontal | 0.4621                           |
| Inferiorparietal     | 0.4614                           |
| Fusiform             | 0.4599                           |
| Superiorfrontal      | 0.4509                           |
| Superiorparietal     | 0.4431                           |
| Parsopercularis      | 0.4425                           |
| Superiortemporal     | 0.4420                           |
| Medialorbitofrontal  | 0.4414                           |
| Caudalmiddlefrontal  | 0.4239                           |
| Middletemporal       | 0.4124                           |

*Table SI - 2: Top 20 regions with maximum correlation strength for bilaterally seeded regions*

| <b>Region Names from structural connectome</b>             | <b><math>R_{\max}</math></b> |
|------------------------------------------------------------|------------------------------|
| <b>ThalamusProper</b>                                      | <b>0.4694</b>                |
| <b>Insula</b>                                              | <b>0.4508</b>                |
| <b>Pallidum</b>                                            | <b>0.4422</b>                |
| <b>Putamen</b>                                             | <b>0.4196</b>                |
| <b>Caudate</b>                                             | <b>0.3977</b>                |
| <b>Accumbensarea</b>                                       | <b>0.3928</b>                |
| <b>Parsopercularis</b>                                     | <b>0.3924</b>                |
| <b>Lateralorbitofrontal</b>                                | <b>0.3923</b>                |
| <b>Parstriangularis</b>                                    | <b>0.392</b>                 |
| <b>Medialorbitofrontal</b>                                 | <b>0.392</b>                 |
| <b>Parsorbitalis</b>                                       | <b>0.3904</b>                |
| <b>Rostralmiddlefrontal</b>                                | <b>0.3903</b>                |
| <b>Precentral</b>                                          | <b>0.3898</b>                |
| <b>Caudalmiddlefrontal</b>                                 | <b>0.3897</b>                |
| <b>Frontalpole</b>                                         | <b>0.3864</b>                |
| <b>Superiorfrontal</b>                                     | <b>0.3846</b>                |
| <b>Rostralanteriorcingulate</b>                            | <b>0.3836</b>                |
| <b>Caudalanteriorcingulate</b>                             | <b>0.379</b>                 |
| <b>Postcentral</b>                                         | <b>0.3643</b>                |
| <b>Paracentral</b>                                         | <b>0.3453</b>                |
| <b><math>R_{\max}</math> – Maximum Pearson Correlation</b> |                              |

**Table SI - 3:** Correlations of ALS-related genes, and their PCA vs empirical atrophy (to the left) and correlations of TDP-43 specific genes and their PCA vs empirical atrophy (to the right).

| All implicated genes |               |              | TDP-43 genes |               |              |
|----------------------|---------------|--------------|--------------|---------------|--------------|
| Gene Names           | Pearson R     | p-val        | Gene Names   | Pearson R     | p-val        |
| KIF5A                | -0.1656186196 | 0.1275200472 | TARDBP       | 0.0587166421  | 0.5912596775 |
| TNIP1                | -0.047536623  | 0.6638298672 | UBQLN2       | -0.1408213232 | 0.1959180963 |
| C9orf72              | -0.2210541014 | 0.040202527  | VCP          | -1.99E-01     | 6.65E-02     |
| TBK1                 | -0.0512079554 | 0.6396119229 | OPTN         | 0.2324602021  | 0.0312558543 |
| UNC13A               | 0.0658038117  | 0.5471989112 | SQSTM1       | 0.046762839   | 0.6689795153 |
| C21orf2              | 0.1303410162  | 0.2316356969 | ERBB4        | 0.1651074327  | 0.1287159075 |
| CHCHD10              | 0.298541968   | 0.0052379237 | EGFR         | -0.0495807645 | 0.6503011148 |
| TUBA4A               | 0.1365186655  | 0.2100696947 | QDPR         | 0.1376219042  | 0.206373713  |
| CCNF                 | 0.1614933579  | 0.1374160643 | CSNK1G2      | -0.2607516048 | 0.0153154119 |
| MATR3                | -0.2673955129 | 0.0128125354 | CSNK1G1      | -0.1431117999 | 0.1886707366 |
| NEK1                 | -0.0228555052 | 0.834542713  | CSNK1A1L     | 0.0437732909  | 0.6890175914 |
| ANXA11               | -0.1058693483 | 0.3319691099 | CSNK1E       | -0.2381853029 | 0.0272160232 |
| TIA1                 | -0.3156106649 | 0.0030756285 | CSNK1A1      | -0.059771397  | 0.5846018753 |
| SOD1                 | 0.2477350679  | 0.0214620101 | CSNK1D       | -0.032865878  | 0.7638668473 |
| FUS                  | -0.0717255375 | 0.5116516682 | CSNK1G3      | -0.1775994452 | 0.1018558544 |
| UBQLN2               | -0.1408213232 | 0.1959180963 | CSNK1A1P1    | 0.0813687883  | 0.4564062443 |
| DCTN1                | 0.128764788   | 0.2373770587 | CSNK2B       | 0.2155003034  | 0.0462938926 |
| ANG                  | -0.0558291315 | 0.6096588566 | CSNK2A1P     | 0.0962652913  | 0.3779312784 |
| TARDBP               | 0.0587166421  | 0.5912596775 | CSNK2A1      | -0.0830659204 | 0.4470364806 |
| VCP                  | -0.1988299645 | 0.0664668969 | CSNK2A2      | 0.201434283   | 0.0629134834 |
| OPTN                 | 0.2324602021  | 0.0312558543 | PARK2        | -0.0576630116 | 0.5979443426 |
| SQSTM1               | 0.046762839   | 0.6689795153 | UBE2E1       | 0.1597739631  | 0.1417082943 |
| PFN1                 | 0.383757023   | 0.0002648659 | UBE2E2       | -0.0478000201 | 0.6620804566 |
| MAPT                 | 0.07828104    | 0.4737282635 | UBE2E3       | 0.184386267   | 0.0892228173 |
| BNIP1                | 0.1176351583  | 0.2807256022 | USP14        | -0.2344893188 | 0.0297697703 |
| PCA1                 | 0.1797        | 0.0979       | USP8         | 0.0853785204  | 0.4344434894 |
| PCA2                 | 0.0515        | 0.6375       | PCA1         | 0.0625        | 0.5676       |
|                      |               |              | PCA2         | 0.1850        | 0.0881       |
